# Supplementary material for: Principles and biological concepts of heredity before Mendel
Source: Springer Nature journal article supplement (doi:10.1186/s13062-021-00308-4), 2021-10-21
Supplement: 13062_2021_308_MOESM1_ESM.pdf [file 13062_2021_308_MOESM1_ESM.pdf]

*Supplementary Material**Corpus Festeticum***Collection of works by Imre Festetics that have survived from the nineteenth century**

Transcription of nineteenth century fraktur German texts were performed by Peter Poczai using using real-time optical character recognition (OCR) implemented in Transkribus. We also thank volunteering translators of the Smithsonian Institution Hela Finberg, Rosanne Johnson and Anne Schwermer offering invaluable help. Much appreciation is expressed to the participants of the Recognition and Enrichment of Archival Documents (READ) project from the European Association for Digital Humanities (EADH) for making their automated recognition, transcription models available for our study, which allowed us building a searchable archive from the digitised historical documents. Alternative translations of words, question marks, words added for grammatical reasons are in [brackets]. Original German and Hungarian transcriptions in the supplement are followed by English translation of the corresponding document.

## Table of Content

1. **Festetics, E. 1815a.** A’ Juhtenyésztés’ jobbítását és pallérozását óhajtó Hazafiakhoz. *Nemzeti Gazda* 10:145–147 [To Patriots who want to improve and palletize sheep breeding. *National Farmer* 10: 145–147]
2. **Festetics, Emmerich. 1815b.** Aus einem Schreiben des Herrn Grafen Emmerich Festetics zu Güns in Ungarn den 20 Juni 1815. *Oekonomische Neuigkeiten und Verhandlungen* 69:547–548. [From a letter from Count Emmerich Festetics from Kőszeg in Hungary on June 20, 1815. *Economic News and Discussions* 69:547–548.]
3. **Festetics, Emmerich. 1819a.** Erklärung des Herrn Grafen Emmerich von Festetics. (Vergleichen Nr. 38., 39. u. 55., 1818). *Oekonomische Neuigkeiten und Verhandlungen* 2:9–12. [Explanation of Count Emmerich von Festetics (Compared Nos. 38, 39, and 55, 1818) *Economic News and Discussions* 2:9–12.]
4. **Festetics, Emmerich. 1819b.** Erklärung des Herrn Grafen Emmerich von Festetics. *Oekonomische Neuigkeiten und Verhandlungen* 3:18–20. [Explanation of Count Emmerich von Festetics (Continuation of Supplement No. 9). *Economic News and Discussions* 2:9–12]
5. **Festetics, Emmerich. 1819c.** Weitere Erklärung des Herrn Grafen Emmerich Festetics über Inzucht. *Oekonomische Neuigkeiten und Verhandlungen* 22:169–170. [Further Declarations by. Count Emmerich von Festetics concerning Inbreeding. *Economic News and Discussions* 22:169–170]
6. **Festetics, Emmerich. 1820b.** Bericht des Herrn Emmerich Festetics als Repräsentanten des Schafzüchter-Vereins im Eisenburger Comitete. *Oekonomische Neuigkeiten und Verhandlungen* 4(19):25–27. [Count Emmerich Festetics’ Report as the Representative of the Sheepbreeders Association of the Eisenburg Committee. *Economic News and Discussions* 4(19):25–27]
7. **Festetics, Emmerich. 1820a.** Äuserung des Herrn Grafen Festetics. *Oekonomische Neuigkeiten und Verhandlungen* 15(20):115–119. [Remarks by Count Festetics. *Economic News and Discussions* 15(20):115–119]
8. **Festetics, Emmerich. 1822.** Über einen Aufsatz des Hrn. I. R. in 3ten Hefte des Jahrganges 1821. *Oekonomische Neuigkeiten und Verhandlungen* 92:729–731. [Count Emmerich Festetics’ Report on the Experiments suggested by the Sheep growers Society, concerning the Feeding of Chaff according to the Petri Method. *Economic News and Discussions* 92:729–731]
9. **André, Christian Carl. 1819.** Erklärung des Herrn Grafen Emmerich von Festetics. Anmerkungen des Herausgebers. *Oekonomische Neuigkeiten und Verhandlungen* 4:26–27. [Explanation of Count Emmerich von Festetics (Conclusion of Supplement No. 3). Remarks of the Publisher. *Economic News and Discussions* 4:26–27]
10. **André, Rudolf. 1819.** Meine Ansichten und Bemerkungen über organische Schwäche, besonders bei feinwolligen Schafen: veranlasst durch den Aufsatz des Herrn Grafen Emmerich von Festetics in Jännerheft 1819. *Oekonomische Neuigkeiten und Verhandlungen* 21 (Beilage):161–162

Festetics, E. 1815a. *Nemzeti Gazda* 10:145–147

Mártius 7-edikén 1815

## HÍRADÁS

A' Juhtenyésztés' jobbítását és pallérozását óhajtó Hazafiakhoz.

(Ez a' hasznos tudósítás mostanában akadt a' kezünkbe)

Valamint bizonyos az, hogy B. Gasiler Ferdinand Úr, a' maga' álhatos iparkodása' példájával, A'mellyel Hoschtitz nevű faluban, Juhserégét olly' híressé tette, a' szomszéd Vidékjét, t.i. egész Morvaországot, Silésiának és Felső Magyarországnak egy részét, hasnoló iparkodásra gerjesztette: szinte olly' tagadhatatlan, hogy ezen a' Vidéken, a' hol az alább nevezett lakik, a többek közt, néhai Méltóságos Csernel Dávid Úrnak példás Juhtenyésztetése, nem tsekély ösztönére szolgált a'közelebbi Mezeigazdáknak, hogy ők is fáradságjokat, és költségjeket is, a' juh fajta' megjobbításától ne kimélnék.

Noha ezen Csernelházi honnyi Gaislerünk' Maradéki, és híres Seregének örökössei, úgy szinte T. Csernel György T.B. Úr, a' juhtenyésztetők között, érdemesen előkelők; vagynak még is már többen is, a' kik iparkodások' béréül, ki magassabb, ki alacsonyabb tökéletesség' léptsőjére emelkedtek.

Midőn magamnak bővebb tudományt szereztem arról, hogy a' Mezeigazák mely fontos és nyomos lépéseket tettek, hogy a' juhtenyésztést Hazájokban, a' tökéletességnek szinte a' tetejére vihessék, a' midőn; minden eszendőben Május' közepén, Brünn Fő-Városában össze gyűlő Juhos Társaságot állítottak fel, a' melyben B. Gaislertől fogva, szinte tsak újonnan lett iparkodásának már örülni kezdő Juhászok, kik a' maga' neveléseféle Marhát, már tavaj elő állították, hogy azok ottan előre megbíráltassanak, azután rész-szerént eladásokban, rész-szerént eltserélésekben legyen módjok; éreztem akkor, hogy egy ilyen rendszabás, a' tökéletesebb Juhtenyésztőnek is, nyújt alkalmatosságot, hogy ottan, eggyik a' másoknak a' Seregében, az abban szembetünő, 's magánál talán híjjános tulajdonságot feltalálhassa, hogy talán a' Gyapjú' legfelsőbb tökéletességének tulajdonságait még inkább kitanúlhatná; - hogy azok, a' kik a' jobbításban; még most fáradnak; ottan, a' kedvek szerént lévő kosvásárlás' idején a' szükséges tapasztalást, és tudományt szaporíthatnák; - hogy az illyes összeállítás' alkalmatosságával, a' szívesenlátott Gyapjú-Kereskedő is egyszerre a' külömb seregek' tökéletességével megismerkedne; de egyszersmind, magyar szívvel éreztem azt is, hogy illy' Társ-szervezet a' Vidékünkben, de mondom egész Hazánkban is, fel nem szímlálható hasznot hajtana!

És, éppen ez a' szív, ez a' haza-szeretet, e' jelenvaló Híradásomnak forrása: mely szerént eltökéltem magamban, hogy ezen projectumomat (elmerajzolatomat) minden juhtenyésztető Uraknak hírül adjam,

TUDNI ILLIK:

Legyen minden esztendőben, Május utolsó Hétfőjén, az alább írtnak az a' szerentséje, hogy N. Patyi jószágon a' Juhos Gazda-Urak gyűljenek össze tetzések szerént, akar személyesen, akar pedig némely marhájokkal együtt. Gondolhatni ugyan, hogy ez a' nap valamennyire, némely Urakra nézve, későre vagyon ejtve; de minthogy alábbírt némely juhaival, rendesen a' Brünni sokadalmat látogattja, attól tart, hogy onnan, annak idejében haza nem érhetne.

Alábbírt ajánlja barátságos készségét, hogy a' megjelenő, mind Úri, mind bundás-gyapjas vendégeinek, kitelhető módon, az otléteket kedvessé kívánja tenni.

A' kik ezen alkalmatosságra, valami marhát küldendenének, vigyázni fognak, kétségekívül arra, hogy a' marhák tulajdon neveléssekfélél legyenek; de ellenben, se himlősök, se koszosok ne legyenek, és hogy azok egyikét nappal korábban érjenek a' majorba.

Hétfőn reggel, a' jelenlévő Urak rendelést tesznek aki-értekezéssel a' tartandó rendtartásról, tanátskozván, ha valyon lehetne-é a' Magyarok között is juhtenyésztést tökkéletesítő Társaságot felállítani: a' mi ha meg történne, annak felállításához, a' jelenlévő Urak hozzá fognának.

Minthogy pedig reménylhető, hogy több érdemes Urak, a' magok' juhaiból némely darabokat előállítanak, a' mellyek el is adatnának, és mivel' a' házi Juhász is valami 50 darab kost kótyavetje által fog eladni; tehát előre akarja bizonyossá tenni minden részvevendő Urakat, hogy akar magános alkuképpen, akar a' kótyavetje által lejendő eladást, a' házi Gazda, tölle kitelhető módon fogja elősegíteni.

Végre, azt bizonyítja alábbírt, hogy ezen törekedésének legnagyobb jutalma a' lesz, ha a' jövő alkalmatossággal azt tapasztalhatná, hogy többen, egyesült vállal nekifeküsznek a' Társaság' felállításának, és így reménylhetné, hogy a' Hazánk' közhasznára tzelozó szándék gyökeret verénd, és Gyümölsével is biztatná az alábbiattat.

N. Paty, Gr. Festetits Imre

Transcribed: Peter Poczai

Festetics, E. 1815a. *National Farmer* 10: 145–47

On March 7, 1815

ANNOUNCEMENT

To Patriots who want to improve and palletize sheep breeding.

(This useful report has just gotten into our hands)

It is also certain that Baron Ferdinand Gasiler, with the example of his treacherous industrialization in which he made his Sheer Army so famous in the village of Hoschtitz, provoked the neighbouring lands, so to speak, to denigrate the whole of Moravia, part of Silesia and Upper Hungary: that in this Region, where the one named below lives, the exemplary sheep breeding of, among others, the late Dignified Lord David Csernel, served no small instinct to the nearby Farmers so that they too would not spare their efforts and costs from improving the breed of sheep.

Although they are the Remnants of our homeland Gaissler from the House of Csernel and the heirs of his famous Army, he is almost honoured by Lord György Csernel, among sheep farmers, deservedly noble; there are even more who have risen to the ranks of higher and lower perfection as the wages of our industry.

As soon as I gained more scientific knowledge for myself about what important and pressing steps the agriculturalist had taken to bring sheep farming in their homeland, almost to the highest of all perfection, when; in every sense, a Sheepy Bunch was set up in mid-May in the capital city of Brno, in which, Baron Gaissler and almost every novel sheep breeder became taking part, those who had begun to rejoice in his industry, or had bred Cattle themselves, for to be judged in advance, then to take part in sales and exchanges; have I in may ways felt then that such an arrangement, even for the more knowledgeable Sheep Breeder, would provide an opportunity, to observe in other's shepherd [army of sheep], or to invent a striking and perhaps incomplete quality in his own, so that perhaps he could learn even more about qualities of the Supreme Perfection of Wool; - that those who are in the process of improvement; there, at the time of the ram purchase could multiply the necessary experience and science; - that the suitability and establishment would be welcomed by wool traders at the same time as to the perfection of traits I also felt with a Hungarian heart that such a partner organization would be of innumerable benefit in our county, but I say also in our whole country!

And, it is precisely this heart, this love of the homeland, which is the source of my present Proclamation: by which I am determined to communicate this project (draft) to all sheep-breeding Lords,

NAMELY:

Every year, on the last Monday in May, may those described Sheep Farming Lords described below be fortunate enough from N. Paty to gather as they please, either in person or joined with selected cattle.

It is conceivable, though, that this day is somewhat, late for some Lords who normally visit the Brno crowds with their sheep and they might fear that arriving back home in shoutable time will not be achievable.

I, the undersigned, recommend my friendly skills making the stay of both the appearing gentleman's and their furry-woollen guests enjoyable in an expedient manner.

Those who would send some cattle for this aptitude should reach the farm on day earlier and should take care that without any doubt the cattle should be their own breed, and should not be infected by smallpox nor they should be found dirty.

On Monday morning, the Lords present will make arrangements for further discussions if it would be possible to set up a Society for the Perfection of Sheep Breeding among Hungarian as well: and it is hoped that this would happen the respected Lords should proceed with it. Because, it is hoped that more worthy Gentlemen will produce some of their own sheep, which they would give away, and since domestic shepherds will also sell some 50 rams by their own way, so I want to make sure in advance to all attending Lords that either by private bargain or by other ways the host will promote and ensure the sales.

At least, the undersigned bellow proves that the greatest reward of these endeavours will be if in the future we could see that more and more people are working together to set up the Association, and so it is hoped that roots of this organization would serve the public good of our country and the fruits of the following initiative would encourage my statement.

Translated: Peter Poczai

**Festetics, E. 1815b. *Oekonomische Neuigkeiten und Verhandlungen* 69:547–548.**

## 222. Correspondenz Safzucht

Aus einem Schreiben des Herrn Grafen Emmerich Festetics zu Güns in Ungarn den 20 Juni 1815

Kein Mensch verlor mehr, als ich da ich durch eine unvorhergesehene, und doch höchst notwendige Reise in das niedere Ungarn verhindert wurde, die Reise nach Brünn in der Mitte Mai vorzunehmen um der Zusammenkunft der Schafzuchten beizuwohnen. Fester wird in mir der Entschluss, die Gesellschaft kommenden Mai zu besuchen. Indessen hatte ich bei Meisners Rüder am 29 Mai eine Peine Limitation von einigen Widdern eigener Bucht, (denn ich habe seit 7 Jahren Peine fremden) veranstaltet. Der Tag war aber nicht vorteilhaft gewählt, er fiel in die erste Woche des Pester Marktes, und am Lage, wo in der nächsten Stadt auch der Jahrmarkt nur zu diele Dez Pronomen beschäftigte Jamessen gingen alle Widder um billige Preise weg und es zeigte sich neuerdings daß jede Gelegenheit wo Landwirte in Landwirt sichtlicher Absicht sich versammeln können das ihrige Beiträgt um den Geist und den Muth der in Haus lascher Manipulation die ganze Zeit hinbringende Subjekte anzuspornen. Sie manschten vielleicht auch von Preisen etwas zu erfahren? In Kürze wird im Ihnen hierüber auch dienen. Ein 4jähriger Mimusch genannter Widder ging pr 1965 fl 30 kr ein ein jähriger Sohn pro 780 fl ein anderer à 550 fl ab. Dies waren freiließ die gefälligsten die übrigen 48 Stade Giengen zu verschiedenen niederen Preisen ab. Außerdem hatte ich 130 Mütter ihres höhern Alters halber veräußert. Diese Giengen zwischen 50 bis Mi das Stad ab. Graf Anton Festetics d. den Mimusch erstanden hatte lauste dann noch 5 ginal 3 und 4jährige Mütter 200 ft das Stad um nämlich für den Mimusch ausgesuchte Braute zu besaßen. Ich lud in meiner Ankündigung alle Schafliebhaber, die eigenes Weih, theils des Bergreicherer, des gelegentlichen Barkaufes Willen, zu mir treiben wollten, freundschaftlich ein. Doch - vielleicht der fatalen Jahrmärkte wegen, erschien fremdes Bieh. Das Liebte war mir, zu der nehmen, daß alle zum Verkauf (in der Wolle) ausgestellte Widder von den Sennern das Lob erhielten, daß nicht einner darunter sey, dessen Schenkel eine Wolle trüge, als die Schulter; daß sie alle auf dem fen Bauche ähnlich feine lange und dichte Wolle Haben; daß an allen 51 Stüden weder Schielhaare (nämlich plassgebrüdte Haare) noch Stichelbaare zu finden wesen sind, ausgenommen wenige grifchen den Hörnern. Dies war unter andern das Urtheil eines Landwirts, der einige Jahre bei dem Geislern wirtschaften half. – Das ich hier niederschreibe, sieht etwas ruhmstüchtig aus, und doch sterbe ich daß die Eigenliebe Peinen Theil daran hat, im Gegentheile bin ich weder mit meiner Schafherde noch mit meinen Wollkenntnissen recht zufrieden. Ich bin sogar mißtrauisch gegen mich selbst, da ich mir einbilde daß die nun 2- und jährigen Söhne des Mimusch den Water an der Geringheit und der Wolle noch übertreffen. Da ich kommenden Jahr am 2 Montag des Monat Juni die Licitation vier füßiger Widder und Mütter zu halten gesonnen bin so hoffe ich dann mehrere Kenner bei mir verebbst ringsum sönnen. Ihr sämtliches Urtheil soll mich des Besseren belehren. So ist mir auffallend gewesen, daß ein paar Sachkundige vorzüglich jene Thiere anpriesen, veren Schweiß in der Wolle weiß, und nicht gelblich gewesen. Soll es wirklich wahr reyn daß jene mit dem gelben Schweiß der Entlastung verworfen waren?

**Festetics, E. 1815b. Economic News and Discussions 69:547–548.**

222. Correspondence sheep breeding

From a letter from Count Emmerich Festetics from Kőszeg in Hungary on June 20, 1815.

No man was lost more than I because I was prevented by an unexpected, yet much-needed trip to Lower Hungary that I had to make to the sheep farms before I could attend the meeting in Brno in the mid-May. The decision to visit the Association next May is growing stronger in me. In the meantime, I had a painful limitation of some rams in my own bay with Meisner's male dog on May 29th (because I have had painful strangers for 7 colors). But the day was not chosen favorably, it fell in the first week of the Pest market, and at the location where the fair in the next town only occupied the decent pronouns, all rams went away at cheap prices and it has recently been shown that every occasion where farmers with farmer's intention can gather to do their part to inspire the spirit and courage of the subjects who are all the time involved in sloppy manipulation. Perhaps you also wanted to find out about prices? I will serve you on this shortly. A 4-year-old ram, called Mimusch, went pr 1965 fl 30 kr, a one-year-old son for 780 fl another for 550 fl. These were released the most agreeable of the remaining 48 Stade Giengen at various low prices. I had also sold 130 mothers of their advanced age. These went from 50 in the city. Count Anton Festetics the Elder, had bought Mimusch then still 5, 3- and 4-year-old mothers 200 fl in the city, namely to own selected mating for the Mimusch. In my announcement I cordially invited all sheep friendly people who wanted to attended to me for their own consecration, partly for the mountain richer, the occasional bar purchase. But - perhaps because of the fatal fairs, strange bows appeared. What I loved was that all the rams exhibited for sale (in the wool) received the praise from the dairymen that there was not one among them whose thighs carried wool as the shoulder; that they all have similar fine, long and dense wool on the open belly; that at all 51 hours there were neither strabismus hairs (namely, plassbrüdte hair) nor burin beards, with the exception of a few who grabbed the horns. Among other things, this was the judgment of a farmer who helped farm the Geisler for a few years. - What I am writing here looks a little glorious, and yet I am dying that Peinen's self-love has a part in it; on the contrary, I am not really satisfied with either my flock or my knowledge of wool. I am even suspicious of myself, because I imagine that the now 2-year-old sons of Mimusch surpass Water in terms of insignificance and wool. Since next year, on the 2nd Monday of June, I am intending to hold the license for four footed rams and mothers, I hope that several connoisseurs will be able to die away with me all around. All of your judgment should teach me better. So it struck me that a few experts praised those animals as excellent, sweat in the wool was white, and not yellowish. Is it really true that those with the yellow sweat of relief were discarded?



Festetics E. 1819. *Oekonomische Neuigkeiten und Verhandlungen* 2:9–12.

## Debatten. Schafzucht.

Erklärung des Herrn Grafen Emmerich von Festetics. (Verglichen Nr. 38, 39 u. 55. 1818.)

Die Nummern 38 und 39 der Ökonomischen Rauigkeiten enthalten einen Bericht, worin ein Ungenannter über die Verhandlungen des Schafzüchtlervereines 1818 rationiert, und mancher kleiner Unrichtigkeiten ungeachtet, des Schafzuchten-Publikums Dank verdient; in dem er dessen beständigen Sekretär Hrn. Rath André zu Berichtigungen, neuen Bemerkungen verleitet hat, in welchen dieser seinen bestätigten Eifer für unsere Sache, seine tiefgegründete Kenntnisse und das rastlose Streben nach evidenter Wahrheit mit enthusiastischer Wärme neuerdings erprobt hat. Würde Hr. Rath André mich, als einen wissbegierigen Empiriker aus Ungarn, des Streites also ohnehin gewohnt, in der Erforschung der Wahrheit auch dort widersprechend, wo ich Erfahrungen zu sammeln, die meinigen zu berichtigen erscheine, dar gestellt haben, so würde ich mich an den Verfasser des Berichtes dort anschließen, wo der würdige Hr. Redakteur seine 12te Note andeutet, ohne jenen Herren, die diesen Mann fanden, unterstützten, schützten, ihrer Freund Schafft würdig befanden, und mit ihm, durch ihn das viele Gute und Rüsliche bewirkten, im mindesten von dem, was Hr. André von den geleisteten auf Ihre Rechnung geschrieben wissen will, von dem Dank, den man auch Ihnen zollen muss, im mindesten Abbruch Thun zu wollen.

In jenem Bericht werde ich namentlich benennt, der dem Grundzins widersprochen habe, welchem mein verehrter Freund Baron Ehrenfels aufgestellt, und der rein physiologisch als wahr angenommen werden soll, und durch Hrn. Herausgeber aufgefordert den Sinn meiner Behauptung zu erleuchten, und sie mit Gründen und Erfahrungen zu belegen.

Die Frage selbst kann auf mancherlei Weise verändert gestellt werden. Ich nehme sie so, wie sie in den Anmerkungen des Hrn. Raths André vorkommt: nämlich, dass die Fortpflanzung in nächster Blutsverwandtschaft, unbedingt, und lange fortgesetzt, nach physiologischen Natur Gesetzen, notwendig zur organischen Schwächung führe. Man sieht, dass hier die Fragen: ob eine solche Fortpflanzung manchmal möglich oder auch noch wendig sein könne: ob sie und wie auch an zu raten sei, nicht der Gegenstand der Frage geworden sind.

Ich muss vorangehen lassen, dass ich meine Natur historischen Kenntnisse durch gelegentliches Lesen, und sich darauf beziehende, und mit Aufmerksamkeit gemachte Bemerkungen sammelte, und so ein eigenes System zur mich bildete, es soll mich demnach nicht befremden, wenn meine – doch unmaßgeblichen Sätze stark bestritten werden sollten.

1tens. Muss ich bekennen, dass ich nicht sicher bin, das Wort organische Schwäche richtig zu verstehen Jetzt verbinde ich damit folgenden Begriff: die Unfähigkeit des Subjekt es, bei sonst guter Gesundheit, die mit seinem Organismus, vermöge Naturgesetz verbundenen Funktionen auszuüben, und in die relativ e Dauer fortzusetzen.

2tens. Unter die organischen Funktionen rechne ich alles, was „zur Erhaltung seiner selbst, zur Fortpflanzung seiner selbst in Subjekten, die ihm gleichen, und zur Erreichung der Zwecke, die von den Subjekten mit Vernunft und den Naturgesetzen gemäß gefordert werden können, gehört.

3tens. Zur eigenen, dauerhaften Erhaltung gehört die starke Konstitution, welche Theils angeboren wird, Theils durch die Erziehung vermehrt, ja auch vermindert werden kann.

4tens. Eben diese robuste Konstitution ist unbedingt ein Bedürfnisse, damit in der Fortpflanzung eben gesunde, den Altern ähnliche Wesen entstehen. Oft gesunde Väter erzeugen minder entsprechende Nachkommen. Es war die Konstitution, ungeachtet der Gesundheit, geschwächt.

5tens. Wenn Vater und Mutter bei der festen Konstitution jene Eigenschaften, die ich zu meinem Zweck fordere, besitzen, so ist es Spiel der Natur, wenn in den Abkömmlingen eine Änderung für sich gehet, oder wenn die Voreltern nicht mit den geforderten Eigenschaften hin länglich ausgerüstet. \*)

//\* ) Vielleicht scheint hier in der Abschrift etwas versehen. Der Herausgeber.//

Diese Grundgesetze glaubte ich evident zu sein, als ich so vieles von und für das Kreuzen hörte und las. Die Bemerkungen die in den täglichen Erscheinungen zu machen mir möglich war, sollten also in mir über jeden Zweifel entscheiden.

Von dem Menschen sollte zwar diese naturhistorische Abstraktion nichts enthalten, dachte ich, denn in der Fortpflanzung s in der engsten Blutverwandschaft vermehrte ja sich dies Geschlecht. Aber wenn ich hiermit gleichsam die Genesis zu beschuldigen scheine, so will ich außerdem noch anführen, dass der Mensch nicht bloß in physischer, sons den auch in spiritueller Rücksicht in Betracht kommt, des spirituellsten und arbeitsamsten Menschen sonst gute Konstitution unterliegt leider oft! Wahr ist es auch leider dass der Mensch (der sogenannte zivilisierte) eben weil er mit Geistergaben ausgerüstet ist, von dem Naturzustand, wo des sein Gesetze nach obigen 5 Punkten wirken würden, durch seine Erziehung, Nahrung, erkünstelten Bedürfnisse, die Art seiner Beschäftigung und zur Sinnlichkeit miß brauchten Instinkt der Fortpflanzung sich sehr entfernt hat. Doch finden wir – auch in meinem Vaterland, der ausharrenden Vormauer der Christenheit, in jenen, durch jene Kriege ganz entvölkerten, nun durch verschrie dehne Rationen bewohnten Gegenden, distinktive Zeichen der Stämme, Racen oder Schläge, wenn man will, daß man von ihrem Wesen auch sicher auf ihren Stannin ur theilen kann. Der Ungar, Armenier, Slovak, Wallach, Zigeuner haben in jenen Gegenden in ihren Gesichtszügen, ihren Bau, Tourmure, selbst der Benehmungsart soviel charakteristisches, daß man als bald und sicher (mitunter *échappés* ausgenommen) auf seinen Stamm urtheilen kann. Bey dem Abzug des Feindes blieben einzelne wenige hie und da in Rohr und Morästen versteckt zurück, und bildeten kleine Bevölkerungsflecke, diese Dörfer, ja manchmal 4 Dörfer pflanz ten sich abgerundet unter sich seit Jahrhunderten fort, und ich bewunderte die Gestalten der dortigen Menschen, und dachte unwillkürlich, so müßte einst der erste Mensch aus den Händen des Schöpfers entsprossen seyn. Kraft, Gesundheit, Arbeitsamkeit, Ausdauer, auch Geist, Muth zeichnet solche Menschen vortheilhaft aus.

Eben in meinem Vaterlande hat man Herden verschiedener Thiere, Pferde-, Borsten-, Horn-, Woll- und Federvieh. Bei Pferden ist seit 30 Jahren die Idee des Kreuzens Sitte geworden. Wenig Gestüte gibt es noch, welche eine alte Race unvermischt erhalten Gaben, von jenen sind unbrauchbare Subjekte entstanden, diese entsprechen ihrer Größe gemäß, doch am besten. Unser ungarisches Rindvieh ist – ohne Kreuzung – in verzag lichtem Zustand verblieben, größer oder kleiner, je nach dem es während des Wachstums genährt wird. Des Borstenviehes mehrere Racen bleiben sich bei der Inzucht ähnlich und gut, ja ich muß behaupten, daß wir, den das schnelle Fettwerden dieser Thiere ein entschiedener Vor theil ist, unter der gemeinsten Volksklasse in dieser Hiu sicht Bleak well's haben. Unsere Zackeln und Zigarros pflanzten sich in der Inzucht immerhin fort und sind und bleiben sich gleich. Die 24 Eyer, von der näunlichen Henne und Hahn, sind die Brut, aus welcher das fünf tige, zur Haushaltung gehörige

Federvieh erzogen worden, und alles ist so gut, so ausdauernd, so organisch vollkommen, als es der Mensch nur wünschen kann.

Ich ging nun noch zu fremden Beobachtungen über. Soll ich von den englischen Erfahrungen Extracte liefern, die jenes principe in and in aufstellten, und seithero mit vollkommenen Exemplaren der Inzucht Wortführer so rühmlich beleget haben? Ich sehe im Ilz-, Märtz-, Puster und andern Thälern von Tyrol und Schweiz einzelne Höfe, aus welchen sich die Vollkommenheit der dortigen Race ausbreitet. In jenem Centro der Vollkommenen muß Inzucht seyn, und die von hier erkaufte Bullen verbessern in zweiter Generation das Geschlecht mit den cousines germaines, dieß ist Fortpflanzung in der Blutverwandschaft – obwohl nicht unbedingt.

Ich sah anderseits reiche Herrn mit schönen, aus jenen berühmten Thälern erkauften Thieren, Melkereyen errichten; man dachte alles gethan zu haben, wenn man obendrein einen Knecht aus jenen Gegenden dazu stellte. Ohne Ausdauer in einem Fache, bald zu einer anderen Liebhaberei übergehend, war dieß arme Vieh den hier ländigen Beamten überlassen. Ohne mit hinlänglichem und gutem Wintergar keinem Sommerfutter versehen zu seyn, auf mageren Weidetriften, alt und jung ge mischt, litt das nun halb verachtete Vieh Hunger, Durst und Elend. Ging es nicht bald ein, so war der Nachwuchs das Bild des Elends, in welchem es aufwuchs; und die Fortpflanzung in enger Blutverwandschaft, unbedinget, das ist ohne Rücksicht auf Alter, Kraft und Gesundheit, war anschaulich, aber in einem anderen Licht dargestellt. Ja ich sah heuer noch theuer erkaufte, so genannte Merinos - Widder und Mütter, alt und jung, VOI. jedem Geschlechte beiläufig 40 Stücke, von einem und die nämlichen Knechte gehütet. Dieß möge wohl unbedingte Paarung heißen.

Mit diesen Erscheinungen, ihren Ursachen, und traurigen oder angestaunten Folgen bekannt geworden, formte ich mir Gesetze, welche ich bei meiner Viehzucht streng befolgen zu müssen glaubte. Bei jeder Gattung Viehes war das erste, der Zweck, den ich erreichen sollte, zu bestimmen. Das Mittel dazu, bei Bastarden, eine judiciöse Krenzung, bey Race - Vieh Inzucht. Bei dem Hornvieh war Zweck, daß es milchreich sei, daß das Bieh eine große Reigung zum Fleischansatz habe. In einer Melkerei hab ich Bastard - Kühe, seit der 3ten Generation wieder in der Inzucht, und ich bildete mir einen Schlag, der mich zufrieden stellt, schon werde ich die Nebenzwecke Gestalt und Farbe auch zum Augenmerk machen können. Borstenvieh von reiner Race, mit den erwünschten Eigenschaften 12 Stück hab ich angeschafft, die junge Bären (?) mit den kürzesten Rüsseln zur Fortpflanzung belassen, die nun aus dieser Inzucht gezogene 360 Stück übertreffen meine Hoffnung. Daß ich also bei diesen Vieh - Gattungen die Inzucht in der nahen und nächsten Verwandschaft befolgte, ist nicht zu läugnen: aber sie war nicht unbedingt. Bedingnisse waren Gesundheit, Kraft, das Alter und die Gegenwart der zu meinem Zwecke führender Eigenschaften. Immer bedacht, daß in den Jahren des Wachsthums das Thier, dessen die Constitution stärken könne, ward auf die Nachzucht fast mehr als auf das Nutzvieh die Aufmerksamkeit gespannt. Das bei diesen Umständen aufgewachse, minder gerathene, wurde immer ausgemerzt, das vollkommenste zur fernern Inzucht beibehalten.

Ein erkaufte Eigenthum, Patty, mit vielen ganz erschöpften Aeckern, bei einem gänzlichen Mangel an Wiesen, ist mir eben wegen der schwierigen Aufgabe eine der kalte, gelbthonige Boden wünschte einen wärmenden Dung, also Schafmist, also auch Schafzucht. Die Beispiele meines schon versterbenden Vaters, jene des Nachbarn David v. Csernel\*), bestimmten mich zur Veredlung der Schafzucht. Holzner ist ers, Geisler s Beispiele erweckten in mir den Eifer diese Veredlung auf hohen Grad zu bringen. Durch die Bibl. Britt. ward ich unterrichtet, daß dessen würdiger Redakteur die Zeit benutzte, und in die Schweizer Alpen acht spanisches Vieh mit Nutzen versetzte. Ich war so glücklich 14 Stück acht spanische 2jährige, 16 Stück Rambouilletter Mütter, und 10 Stück Widder zu bekommen.

Die Wolle des einen Widders und 9 panischer Mütter gewann meine Vörliebe. Ich weiß nicht, ob ich die beste Wahl traf, denn ich gestehe,

// \*) Ein noch nicht genug bekannter, achtungswürdiger Schafzüchtler. Der Herausgeber.//

ich bin mit mir noch nicht eins, welches die beste Wolle seye. Genug, ich ging von meiner Vorliebe nicht ab, und arbeitete seit 1803 immer auf jene Wolle, die das Ideal der besten Wolle mir schien. Nach meinen, mir eingeprägten physiologischen Begriffen, glaubte ich nicht sicher fürzugehen, als wenn ich in diesen 10 Stücken die serupulöseste Inzucht befolgen würde. Seit 16 Jahren sind in diesem Stamm nur Widder aus selber gewählt, verwendet worden. Unbedingt war die Inzucht nicht. Der Widder mußte 30 Monate wenigstens alt, robust und in der Wolle der beste seyn. Den ersten Stammvater hießen meine Leute den Santa (der Krumme) weil er etwas hinkte, seine Nachfolger waren nach und nach die sogenannten Palafor, Araujuez, Mimusch, kleine Mimusch; heuer wick dieser letzte seinem Sohn Paular. Dieß ist die Genealogie der Widder, immer einer der frühere Sohn. Weiblicher Seite, muß ich bekennen, war die Fortpflanzung mit Bruder oder Neffen. Dieß ist also gewiß, was Hr. Rath André eine abgeschlossene Race nennt, und meine Umgebung die Mimusch - Race zu taufen beliebte. Noch muß ich bemerken, daß dieser kleinen Heerde nebst der eigenen Wolle, auch eine ihr eigene Gestalt sich gebildet habe, welche dessen Thiere, von jenen der größeren Heerde merklich unterscheidet, eine Gestalt, die bei allen Mimuschen vorherrschend ist, so zwar, daß ich 24 Stück zweijährige Widder nur besitze, welche treue Portraits ihrer Ahnen sind, 16 Stücke sollen bei meiner nächsten Aufstellung Preis gegeben werden.

Die Frage, in wie weit in dieser Race der Organismus gestärkt, oder geschwächt worden sey, zu entscheiden, kann ich kein Richter seyn, und deßwegen glaube ich am besten zu thun, wenn ich das Urtheil zu fällen, der verehrten Gesellschaft, sowohl durch ihre Beschau - Commission, als in Pleno übertrage. Zu diesem Behuf werde ich zu der nächsten Zusammenkunft in Brünn, den kleinen Mimusch, im Alter von 6 Jahren, und einen zweijährigen Sohn, Race - Vieh mitbringen.

Soll ich hier auch noch beschreiben, welche Wolle jene war, welcher ich meine Vorliebe schenkte? Sie war jene, welche nebst jenen Eigenschaften, welche das Vlies vollkommen machen, auf dem Thiere so geschlossen da steht, gleichsam durch eigene Cohäsions - Kraft, Faden an Faden sich wechselweis unterstützend, stämmig, ich möchte fast sagen, dem Asbest nicht unähnlich. Diese Eigenschaft verbirgt zwar sehr oft dem Auge die hohe Feinheit des Fadens, welcher sie doch nicht widerspricht. Ich meinte aber dabei Dichtigkeit und Elasticität in der Wolle nur durch solche fest zu erhalten. Als ich dieß Jahr die dreierlei Charaktere der Wolle an 6 Stück Widdern der Beschau - Commission unterbreitete, war ich im Zweifel, ob ich nicht bloße Liebhaberei triebe, um so mehr, da ich so viel lobwürdiges vernommen, von Wollen, welche von meiner Lieblingswolle so wesentlich unterschieden waren. Der Ausspruch zu Gunsten des Nr. 9 beruhigte mich zwar, aber entsprach nicht ganz meiner, vielleicht auch nicht deutlich genug gemachten Frage, welche heißen sollte: da diese Thiere dreierlei Charakter von immerhin geschätzter Wolle tragen, einen motivirten Spruch zu fällen, welche denn jene seye, welche der Schafzüchtler des Oesterreichischen Staates vorzüglich zuzuziehen bemühet seyn soll. Eine detaillirte Benennung der Qualitäten würde uns viel näher gebracht haben, zur Beantwortung der André'schen Frage: welche Wolle ist die beste? Und haben wir in unserer Sprache noch nicht das Vermögen, dasjenige, was durch Anschauung, genaue Untersuchung zu einem Begriff reift, deutlich auszudrücken, so ist der Beweis unumstößlicher, daß Vereine, wo verschiedene emsige Züchtler ihre Wollen Träger zu comparativer Untersuchung zusammenstellen, von nicht zu berechnendem Nutzen sind für all jene, die manch verworrene Begriffe berichtigen, ihre Erfahrungen erweitern, und ihre Sinne zur leichteren Beurtheilung schärfen wollen (Beschluß folgt.)

Festetics, E. 1819. *Economic News and Discussions 2: 9–12*

## Debates: Sheep Raising

## Explanation of Count Emmerich von Festetics (Compared Nos. 38, 39, and 55, 1818)

Numbers 38 and 39 of the *Economic News* contain a report, in which an anonymous person talks about the discussions of the sheep-raising association, and the sheep-raising public deserves thanks concerning some unnoticed small errors; in which he, the permanent secretary, lured Hon. Advisor Mr. André for corrections, new observations, which confirmed this zeal for our business, his profound knowledge and the restless support for evident truth has approved recently with enthusiastic warmth. Advisor Mr. André would publish me, as a curious empiric from Hungary, therefore, besides, accustomed to strife, in also contradicting the investigation of truth there, where I have gathered practical experience, which my published reports have represented; thus I would be connected to the author of the report, where the worthy Mr. editor makes his 12<sup>th</sup> note, without those gentlemen, whom this man found worthy of supporting, defending their friendship, and with him, brought by them much good, at least from that writing produced from their calculation which Mr. André wants to be aware of, for which one also has to be grateful, for wanting to do the least amount of damage.

In that report I will of course designate the groundwork which I have contradicted, which my esteemed friend Baron Ehrenfels set up, and which should truly be called as purely physiological, and called upon by the publisher to illuminate the meaning of my statement, and to verify it with fundamentals and practical knowledge.

The question can be asked in a different way. I take it thus, as it would come up in the remarks of Advisor André: namely, that reproduction unconditionally [implicitly] in the closest relationships by blood, set according to physiological nature and continuing for a long time, would necessarily lead to organic weakening [debilitating]. One sees here the questions: whether such a reproduction can be sometimes possible or even necessary: whether perhaps to be advised; the matter [subject] of the question would not be found.

I have to take the lead, that my knowledge of natural history from occasional reading, and being taken up with it, and collected remarks made with attention, and thus my own system is formed; it should accordingly not surprise me, when my (still unauthorized [irrelevant]) sentences were bound to be strongly challenged.

First. I must admit, that I am not certain, the word organic weakness [infirmity] is understood correctly. Now I combine with it the following idea: there is the inability of the subject, otherwise in good health to be able to exercise [function] with its own organism according to natural law and to endure for a relatively long time.

Second. Under organic functions I consider everything which belongs “for conservation [obtaining] of its own self, for reproduction of itself into subjects, which are like them, and for reaching the objective [aim] and which are able to claim [demand] from the subject with reason [intellect] according to natural laws. [end quote?]”

Third. A strong constitution is suitable for proper, permanent conservation, which will be partly inborn [innate], will partly increase because of education [upbringing], indeed which also is able to decrease [be diminished].

Fourth. This evenly robust constitution is unconditionally [implicitly] a requirement, found with it in reproduction evenly [level], which the elderly originate similar being [entity]. Often fathers produce lesser [minor] corresponding descendants. It was the constitution, regardless of health, [that] had weakened.

Fifth. When the father and mother are endowed with the strongest constitution, those qualities which I claim [demand] for my objective [aim], then it is a play of nature, when in descendants [the qualities] are altered, or whenever the ancestors are not equipped with enough of the required qualities. \*)

//\*) Perhaps it seems something is omitted here in the transcript [copy]. The editor. //

I believe these fundamental laws to be evident, as I heard and read so much from and for crossbreeding. The observations which it was possible for me to make in daily phenomena therefore obliged me to decide [determine] over any doubt.

Indeed, this natural historical abstraction does not include people, I thought, because in reproduction in the closest blood relationship the kind [type] is propagated [increased]. However, with this, I seem, as it were, to impute Genesis, so I still want moreover to allege, that the person does not only come into consideration in the physical, but also in intellectual [spiritual] respect; otherwise, the most spiritual and hard-working person is subject to good constitution unfortunately often! It is also unfortunate! That the person (so-called civilized) since he is even equipped with intellectual gifts, has become very removed [withdrawn] from the primitive [natural] state, where the statements in the 5-points above would have effect, through his upbringing, nourishment, necessities, [and] the type of his occupation, and measures for sensuality the needed instinct for reproduction. Still we find here, in my Fatherland as well, the persevering bulwark of Christendom, in that, entirely depopulated by that war, now by scarcity of rations of inhabited regions, distinct signs of tribes [*Stamm*], races or breeds, when one wants, that one is certainly able to form an opinion about their tribe [*Stamm*] from their being [entity]. Hungarians, Armenians, Slovaks, Gypsies have in those regions in their facial features, their structure, characteristic manner of behaving themselves, that soon and surely one is able to form an opinion about their tribe [*Stamm*] (sometimes they are called *echappes* [French, runaways]). With the withdrawal of the enemy a few individuals remained behind and hidden here and there in tunnel and morass, and formed small populated areas of land; these villages, indeed sometimes 4 villages, were planted among themselves for roughly a century gone, and I experienced the forms [shapes] of those people there, and I thought unwillingly, once upon a time the first person had arisen thus from the hands of the Creator. Such people exhibit advantageously strength, good health, industriousness, perseverance, also spirit, courage.

Even in my Fatherland there are herds of various animals: horses, swine, horned cattle, animals with wool and poultry. With horses, 30 years ago the idea of crossbreeding became custom. There are even a few stud farms, which retain an old race purely of gifts [talents], from which useless creatures have arisen; these correspond to [are suitable for] their size, still at best. Our Hungarian horned cattle have (without crossbreeding) continued to stay the same in certain condition, larger or smaller, meanwhile depending on what they are fed for growth. Through inbreeding many kinds of swine remain the same, and well, I must declare, that the rapid fattening of these animals is an apparent advantage, we have

Bakewell's among the common people in this respect. Our *Zackers* [type of sheep with horns] and *Zigarros* were raised [propagated] anyway through inbreeding and are and remain the same. The 24 eggs from nine hens and rooster are the brood, from which the fifty proper poultry were brought up for housekeeping, and all is so good, so persevering, so organically perfect, as a person it could only wish it.

I turn now to foreign observations. I am obliged to furnish extracts from the experience of the English, who set up those principles [*in and in*], and who, thus praiseworthy spokesman, have been occupied since then with perfect examples of inbreeding? I see in the Valley of Märtz, Puster, and other valleys of Tyrol, and Switzerland individual barnyards (from which perfection of the race must inbreed there, spread into the center of perfecting), and the bulls purchased from here improve in the second generation of sex with *cousines germaines* [first cousins]; this is reproduction in close relationships, if not unconditional.

On the other hand, I saw rich gentlemen with beautiful animals producing milk purchased from those famous valleys; they thought of everything which had to be done, when in addition they hired a farmhand from those regions for that purpose [to that end]. Without perseverance in one activity [business], soon passing to another hobby, they abandon the poor animals here to the rustic officials. Without providing adequate and good winter and even no summer fodder [feed], in meager willow pastures, old and young mixed, the now half-despised animals suffered hunger, thirst and misery. It did not fizzle out soon, thus the younger generation was the picture of misery, in which it grew up, and reproduction in close relationship, unconditionally, that is without regard for age, strength and health, was graphic; however, it is represented in another light. I saw purchased this year's so-called Merinos, even though expensive, rams and ewes, old and young, 4 head incidentally to each sex, watched by the same farmhand. This might well be called conditional mating.

These phenomena, their causes and sad or astonishing consequences having become known, I formed my rules, and believed I was obliged to follow them strictly in my stock-farming. The first was to determine the goal [aim] I had to attain in each type of cattle. The means for that end, a judicial crossbreeding, in mongrels [bastards] in race: in-breeding cattle [livestock]. In horned cattle the aim was milking [dairy], which the cattle have a great tendency, for putting on flesh [meat]. For milking, I have mongrel [bastard] cows, inbred until the third generation again, and I formed a breed [*Schlag*], which brought me satisfaction; already I was also able to give attention to formation and color as the secondary aim. I have procured 12 head of swine of pure race, with the qualities desired; the young swine with the shortest snouts for reproduction, the 360 head now bred out of this inbreeding surpasses my hope. The fact that I therefore with this type of animal complied with inbreeding of the close and the closest relationship is not denied: however, it was not unconditional. Stipulations were health, strength, age and presence of qualities leading to my goal. It [was] always the intent, that during the years of growth of the animal, the constitution of which could be strong, became upon after-breeding almost more like the attention extended to domestic cattle. In these circumstances, the adult [animals] turning out the most poorly were always rejected, the perfected [ones] kept for further inbreeding.

One purchased property, Patty, in the presence of many entirely depleted fields, with a complete lack of meadows, is a difficult lesson even to me because the cold yellowish ground wished a warming fertilizer [dung], therefore sheep manure; therefore, also sheep-raising. The example of my father who had died, that of neighbor David v. Csernel \*); I decided to improve sheep raising. It is Geisler's example awoke in me a passion to bring this improvement to a higher grade. I was taught by the Britt., the worthy editor of which made use of time, and in the Swiss Alps, transferred prohibited Spanish

domestic animals [cattle]. I was thus fortunate to obtain 14 head of prohibited Spanish two-year old, 16 head Rambouilleteer ewes, and 10 head of rams. The wool of a ram and a Spanish ewe won my approval. I do not know whether I found the best selection, because I admit,

//\*) An estimable sheep farmer still not well-known enough. The editor. //

I am not yet one with myself, on what the best wool is. Enough, I departed [went off] from my preference, and always have worked since 1803 on the best wool which seems to me to be the ideal. According to me, the physiological ideas impressed upon me, I did not believe it more certain to proceed, than when I would comply with inbreeding in these 10 head. For 16 years, only the very same chosen rams were used in this breed [*Stamm*]. Inbreeding was not unconditional. The ram had to be at least 30 months old, robust and with the best wool. My people call the first father of the breed [*Stamm*], Santa (the bent one [*Krumme*]) because he limped somewhat; little by little his descendants were the so-called Palasor, Araujuez, Mimusch, Little Mimusch; this year the last gives way to his son Paular. This is the genealogy of the ram, always one of the former sons. I must admit the female side, reproduction was with brothers or nephews. This is therefore certain, that which Advisor Mr. Andre calls a finished race and to baptize my favorite associates the Mimusch-Race. I must note that this small herd, along with the special wool, has also developed a special shape [form], where the animal differs markedly from that of the larger herd, a shape [form] which predominates in all Mimusches; thus certainly, the fact that I possess only 24 head of two-year old rams which are true portraits of their ancestors, 16 head ought to be presented with my next exhibition prize.

The question, to what extent in this race the organism becomes stronger, or becomes weaker, I cannot be a judge to decide, and therefore I believe in doing the best, whenever opinion goes down, the respected society [company] not only through their inspection commission, as transfers [carries over] in plenum. With a view to this I shall bring little Mimusch, 6 years old, and a two-year old son, Race-animal to the next meeting in Brünn [Brno].

Should I also describe here what kind of wool that was, which I prefer? It was that, which along with those qualities, which makes the fleece perfect, on the animal thus formed stands there, to a certain degree by characteristic strength of cohesion, fibers mutually supporting each other, strong, I would almost say not unlike asbestos. This quality certainly conceals very often the extreme fine quality to the eye, which it still does not contradict. However, I meant moreover retaining thickness and elasticity in the wool only by this. This year as I presented 6 rams with a three-fold character of the wool to the inspection commission; I was in doubt, whether I did not compel mere partiality, around so much more; here I perceived so much worthy of praise, of wool, which thus differed essentially from my preferred wool. The decision [declaration of opinion] for the advantages of No. 9 indeed reassured me, but did not entirely correspond to my question, perhaps also not posed clearly enough, what ought to be meant: here this animal with three-fold nature [character], always bears wool of value, motivates one to give the verdict, which then is that, which sheep raiser of the Austrian government should take the trouble to call in especially. A detailed naming of the qualities would have brought us closer to answering André's question: what kind of wool is the best? And we do not yet have in our language the ability that which, by perception, precise [accurate] study travels toward an idea, to be clearly printed. Thus, the evidence [proof] is irreversible; the associations [societies], where various active [industrious] breeders bring their wool together for comparative examination [study], several intricate [confused] ideas are reported from not calculating use for all of that; [they] should share their experience and sharpen their meaning in order to make judgement [valuation] easier (end follows).



Translated by Rosanne D'Aprile Johnson January 24, 2020

NB: The author used two different words that can be translated as “breed”: *Stamm* and *Schlag*. *Stamm* normally means *trunk*, *stem*, *tribe*, etc. I did translate *Stamm* as *tribe* where it seemed appropriate.

**Festetics E. 1819. *Oekonomische Neuigkeiten und Verhandlungen* 3:18–20.**

## Debatten. Schafzucht.

Erklärung des Herrn Grafen Emmerich von Festetics. (Fortsetzung von Beil. Nr. 9.)

Dies ist nun aber auch alles, was ich auf die Frage, so wie sie gestellt war, zu antworten weiß. Viel zu wenig, um daß mein Benehmen Jemanden verleiten sollte, von seiner Veredlungsmethode abzuweichen, denn ich gestehe, hätte ich gewußt, Widder mit ähnlicher Liebe lingswolle versehen, und deren Race ich mein volles Vertrauen hätte schenken können, mir von Zeit zu Zeit anzuschaffen, auch ich hätte mich zur Auffrischung - aber schwerlich zu einer Kreuzung verleiten lassen“) und wäre nun nicht im Stand, eine schon 15jährige Erfahrung in die Debatten einzuführen. Indessen ist mein Wunsch, daß diese meine Aeußerung Gelegenheit verschaffe, durch Debatten, denen ich entgegen sehe, Grundsätze bestimmen zu sehen, nach welchen mit Sicherheit und Schnelligkeit das Veredlungsgeschäft angerathen werden könne. Indessen will ich in voraus einräumen, ") daß meine systematische Inzucht eine Probe sey, die, obwohl von 100jährigen Beispielen abgeleitet, nur jung genannt werden kann. 2) Daß so wie die Fabrikate aus der Schafwolle verschieden sind, also auch die Fabrikanten die zu ihrem Fabrikate mehr geeigneten Wollegattungen suchen, und nach dem Werth des Fabricates auch die benöthigte Wolle im höheren Preis ankaufen können 3) Daß die Thiere, welche diese verschiedenen Wollen tragen, auch ihre Eigenschaft sich constant angeeignet haben können, und daher ein jedes in feiner Art eine Race Schlag oder Stamm heißen können, und als solche ihren vorzüglichen Werth haben müssen. 4) Daß in so weit, als zwei solche Stämme sich kreuzen würden, ihre Nachkommen obgleich von beiden Seiten von Race - Thieren abstammend, doch im wahren Sinne Bastarde sind, und in so weit stimme ich meinem verehrten Freund Ehrenfels bei, daß auchächt spanisch Vieh Bastard feyn kann, und daß diese Bastarden so lange Bastarden bleiben, bis durch die Paarung die Nachzucht den einen oder anderen primitiven Charakter annimmt, und selben sich wieder coustaut aneignet. Zum Behuf öefer meiner Beauptung werde ich mit jenen zwei Widdern auch ein Paar Bastarde mitbringen, wo nämlich die Väter aus der Rimusch - Race, die Mütter aber aus den, in dem großen Haufen verschmolzenen Rambouilleter Müttern gepaart oder gekreuzt wurden. Mir scheint, dies ist es auch, gegen welches in den schätzbaren Oek. Nei: igf. auch öfters, und meinen Begriffen zu Folge mit vollen Grunde gewarnt wird, aber am deutlichsten, wie in der Beilage Nr. 1. des Hesperus von 1818 der Verfasser Seite 4 und 5 §. 2. sich ausdrückt. Ich bekenne, daß diese Worte goldene Regeln enthalten, welche leider! vielleicht von den meisten Schafzüchtlern sind verachtet worden. Dies ist es, was Moro in der Note F. 2. §. Originalität mit Folgendem ausdrückt: Dabei bemerken wir insbesondere an ganz fertigen Tuchen, daß diese ausgefuchte ganz feine Wolle über die ß unter sich gleichartiger als die reinste in ländische war, und keine einzelnen gröberen Haare, welche sich bei genauer Ansehung auch dem Auge verrathen, mit sich führte :e. c. Hätte ich mehr Eigenliebe, so würde ich unbedingt zugeben, daß die 10 auserwählten Stücke, die Urahnen meiner Mimusche, weder ächt spanische Race, noch Bastarden mit constanten, festhaltenden Eigenschaften gewesen seyen. Nur das könnte ich behaupten, daß ich das wenige lobenswürdige meiner Mimusch - Race der höheren Einsicht, lut welcher ich nach richtigem, bestimmten, der Sache angemessenstem und consequentem System diesen Stamm behandelte, zu verdanken habe: aber so erkläre ich, daß ich bei der Inzucht zu bleiben mich dadurch gezwungen fühlte, weil ich nirgends mit vollem Vertrauen einen Racc - Widder kaufen zu können glaubte, und weil ich den Lieblingscharakter meiner Wolle überall vermißte. All mein Verdienst könnte also feyn, daß ich ein Exempel aufstelle, wobei ich die in der Inzucht wirkende Ra tur nicht hinderte, nicht irre geleitet habe.

Alle die Fragen, welche Hr. Rath André an die Veteranen der Schafzucht, in den genannten zwei Nummern in den Noten hinwirft, sind wohl geschaffen, den wiß- und lehrbegierigen Veredler der Wolle aufzu schrecken aus dem behaglichem Wahne, als hätte er schon alles gethan und erreicht. Wer ist aber im Stande, sie - alle zu beantworten, seine Behauptungen, mit Gründen und Erfahrungen zu belegen ? Auch soll diese meine, ich möchte sagen, geschichtliche Darstellung meines Verfahrens für keine Behauptung gelten. So handelte ich, so stehe ich nun nach 15 Jahren, ist die Schwächung des Organismus eingetreten oder nicht ? Zu der Hochachtung, mit welcher ich meine Meinungen der Berichtigung, meine Wißbegierde den vielfachen Erfahrungen und Einsichten des verehrten Schafzüchters. Bereins willig unterordne, lege ich nur die Erklärung bei, daß da wir die Wahrheit zu suchen uns bestreben, motivirter Widerspruch, scharffinnige Debatten mit reinen Erfahrungen belegte Behauptungen, und aus all diesem syst matische Gesetze abzuleiten, wie es an sich ersten und am schnellsten zu der constanten und nützlich sten Wollrederlung zu gelangen sey, meine Absicht bei Verfassung gegenwärtiger Declaration gewesen sey. G. Emmerich Feltetics. (Beschluß folgt.)

// \*) Ich glaube, daß die österreichische Monarchie weder in der geographischen Lage, noch vermög ihrer Größe, und dem in ihr bestehenden foederativen Zustand je geeignet war, eine Wollveredlung so ausgiebig und folgerich durchzuführen, als Sachsen. In dem viel kleineren Sachsen, sind die der ganzen Welt frey zugänglich Messen. Dort entstand der noch immer in der Inzucht erhaltene Rochsburger Schafhof. Dort be stimmte das nach England ausführende, und die Wolle sortirende Handlungshaus Kähler die Preise, und dadurch den innern Werth der Sächsischen Wolle, und dies gab auf öffentlichem Markt den Impuls, diese bestimmte Wolle anzuziehen. Wie ganz anders ging es in Oestrich zu, wo eine Phantasie, die Liebhaberei der Kragen, Koder und Falten den hohen Werth eines nackten Widders annoch zu bestimmen pflegt. Die Race Capuziner und Franziskaner genannt, hat den Schafzüchtlern viel Geld gekostet, und die Ver edlungsperiode sehr verlängert. Daß aber ein wärmeres Klima, folglich der Oesterreichische Staat der Veredlung angemessener sey, zeigt die Erfahrung, daß das in Hollitich, und von mir erkaufte Vieh in Be kecher Comitatus eine um so viel feinere, längere und ausgiebigere Wolle trage, dürfte auch Hr. v. K e es, der in diesem Frühjahr sich davon zu überzeugen Gelegenheit hatte, bestätigen. Dort wog das Vlies eines durch den Wollkäufer selbst gewaschenen und geschorenen Widders 9 Pf, der in seiner Heimath Patty schwerlich 6 Pf, geschoren hätte. Das Spiralförmige ist meines Erachtens eine Folge dessen, daß die sonst dicht etwas gekraufete Wolle auf dem Körper weniger dichter, schütter werde, und folglich Raum gewinnt, sich in Flocken zu winden, aber nicht, daß dieß von dem Klima abhängt. Die lange, gerade Wolle mit dem Silber glanze liebe ich zwar, und ist je nach ihrer Feinheit den feinsten und Glanz haben sollen den leichten Stoffen die angemessenste, sie ist eine eigene und sehr geschätzte Race, mir war es aber nicht möglich, beide Racen, diese sogenannte sächsische, und meine Mimusch - Race, mit gleicher Aufmerksamkeit, Borliebe und verbürgender Reinheit zu behandeln. Ich glaubte Wunder gethan zu haben, diese meine Race für sich erhalten zu haben. Diese geradfädige Wolle eignet sich leicht zu dem Fehler hin, daß die Wollfäden statt in paralleler Richtung zu bleiben, gerne in kreutz uud quer sich verwachsen, welches meiner Ansicht gemäß ein Nachtheil für den Fabrikanten ist. Bei der Verfeinerung der grobwolligen Mütter mit feinhaarigen Widdern wird die Erscheinung, daß der feinste Flocken Wolle von Fäden verschiedener Dicke zusammengesetzt ist, durch mehrere Generationen stark bemerkbar bleiben. Die Fütterung eines Schafes kann auf Erscheinungen in der Wollerzeugung wesentlichen Einfluß haben. Ein Schaf, so im Frühjahr bei der Schur in voller Kraft, und gut beleibt ist, wird eine Wolle aufsetzen, welche das ganze Jahr Dichtigkeit zu haben scheint. Ein Schaf, welches zu jener Zeit nicht im vollkommenen Zustand sich befindet, wird eine schütterere Wolle aufsetzen, und später erfolgende Wartung, und kräftige Nahrung ersetzt nicht die Dichtigkeit, aber sie verlängert die Wolle ungemein. Obwohl an Feinheit keines dieser Wollen eine Veränderung erduldet, so wird das Aug, welches fein

Urtheil schnell zu fällen gewohnt ist, die Schütter für feiner erklären. Dieß möchte jenen, welche Stammwider wählen, sehr oft schädlich geworden seyn. Daß mit einer gleich feinen, aber mehr geschlossenen Wolle, die Elasticität mehr in Verbindung stehe, möchte ich bemerkt haben. Nicht die Kraft des Zusammenziehens der einzelnen Faden, sondern die Kraft, mit welcher ein fest gedrückter Ballen sich wieder auszudehnen bestrebt, ist die von mir verstandene Elasticität. Auf Stoffen, welche mit einem Filze überzogen werden sollen, ist die Elasticität höchst nothwendig, so wie schädlich, wo ohne Filz, durch die warme Presse allein, eine dem Atlas ähnliche, glänzende Fläche zu erzielen ist.

## Festetics E. 1819. Economic News and Discussions 3:18–20

## Debates. Sheep Raising

## Explanation of Count Emmerich von Festetics (Continuation of Supplement No. 9)

However, this is now also everything, which I know to answer the question that was asked. Much too little, that my behavior should mislead anyone, diverging [leading away] from my methods of improvement, because I admit, had I known, providing rams with similar affection, and the race to which I from time to time managed to offer my complete trust [confidence], I also would have allowed luring myself toward regeneration, but hardly toward crossbreeding; “) and now [I] would not already be in a position to introduce into the debates an experience of fifteen-years. Meanwhile, [it] is my wish that my remarks get the opportunity, through debate, to which I look forward, to see principles determined, according to which I would be able to recommend the business of improvement with certainty and speed. Meanwhile I want to concede, “) that my systematic inbreeding is evidence [proof] which can only be called young (although that is derived from a 100-year-old example). 2) Since the products of sheep’s wool are so different, therefore the makers [manufacturers] also search for more suitable types of wool for these products, and according to the value of the products also would be able to purchase the needed wool at higher prices. 3) That the animals, which bear these different [kinds of] wool, the characteristics [quality] as well there could have been acquired [assimilated], and hence each one of its kind may be able to be called a race [*Race*], breed [*Schlag*] or breed [*Stamm*], and must have as such their excellent [superior] value; 4) that to this extent two such breeds [*Stämme*] would be crossbred, their descendants, although balancing from both sides of the race-animals, are still in the true sense mongrels [bastards, *Bastarden*], and to this extent I agree with my esteemed friend Ehrenfels, that outlawed Spanish [see translator’s notes] mongrels may be domestic animals, and that these mongrels remain mongrels so long, until after-breeding [*Nachsucht*] by mating [pairing], take on some primitive characters, and are invariably suitable again. With a view to this, I will bring a pair of mongrels with these two rams to my officials, namely, fathers from the Mimusch race, but would be mated or crossed with the ewes from the Rambouillet ewes combined in great multitude. It seems to me, this is also against what is in the estimable Economic News; one is also more often warned against my ideas in consequence with complete justification, but the author is printed most clearly in supplement No. 1 of Hesperus of 1818, pages 4 and 5 § 2. I admit, that these words contain golden rules, which unfortunately! perhaps have been despised by most sheep raisers. It is this, which Moro in Note F. 2. § *Originali* did print subsequently: Thereby we note above all about cloth [textiles] already made, that this completely fine wool selected above was more homogeneous than the purest in the district, and no individual coarse hairs, which also betray themselves to eyes observant enough, with followed. If I had more egotism, I would unconditionally yield, that the 10 head selected have been the great-grandfathers [ancestors] of my Mimusches, neither respected Spanish race, nor mongrels with constant [invariable] qualities. I am able to assert only this, that I praise the highest inspection of my estimable Mimusch-Race, which I handled this breed [*Stamm*] according to proper business, determined by the most appropriate and consistent system; I must be indebted: but I explain, that I felt compelled by this means to stay with inbreeding, because I believed it was not possible to buy with complete trust a ram-race anywhere, and because I missed the favorite character of my wool overall. All my profit therefore may be, in that I display an example, whereby in inbreeding I did not hinder working [effective] nature; [it was] not accompanied by errors.

All of the questions which Mr. Advisor André [brought] to the veterans of sheep raising, in the named two numbers in the notes, to have indeed managed to startle the pleasant delusions of the improver [refiner] of wool eager for knowledge and learning, as he already had done and attained.

Who however is in the position to verify their own assertions with grounds and experience and to answer everything? I would have been able to say, this, my historical representation of my method, also should not pass for any assertion. Did I handle it, that is, do I now stand after 15 years, has weakening [debilitation] of the organism occurred or not? For the esteem with which I my opinions of reporting, my eagerness for knowledge of manifold experience and examination of the revered sheep-raiser [verb missing from this sentence]. I willingly submit, I add only the explanation, that there we strive to search for the truth and, motivating contradiction, ingenious debates verified by pure experience, and leading away [diverging] from all of these systematic statements, how at first it itself is enough, and toward the most constant [invariable], quickest and most useful improvement of wool; my intention as author is the present declaration. G. Emmerich Festetics (Conclusion follows.)

//\*) I believe, that the Austrian Monarchy, neither in geographical position nor in size, and its existing federal state was ever able or situated to realize [accomplish] wool-refinement [improvement] as rich and important as that of Saxony. In the much smaller Saxony, measures are freely open to the entire world. The Rochsburger Sheep farm still supporting inbreeding originated there. In that place, Kähler determined prices [costs], exporting and arranging wool business with England, and by this means establishing the internal value of Saxon wool, and this gave to the impulse from public market to extract this wool. How entirely different it occurred in Austria, where a fantasy, the fondness for collars, enticements and pleats [folds] raises a bare ram to high value as yet determined. This race, called Capuziner and Franzikaner, has cost the sheep farmer a lot of money, and the refinement [improvement] period is very prolonged. However, the fact that a warmer climate is accordingly suitable for improvement the Austrian government shows the experience, which that in Hollitch and from one so much more my purchased animals [cattle] in Bekescher Committee bear finer, longer and more abundant wool, Mr. v. Ke es [*sic*] also was allowed, who in this spring had been convinced of it, the opportunity verified [confirmed]. In that place, the fleece of one ram, washed and shorn by the wool buyer himself, weighed 9 pf [pounds]; that which had been shorn from the native Patty [see article translated previously] hardly [weighed] 6 pf [pounds]. In my opinion, the spiral shape is a consequence of the fact that the otherwise thick, frizzled wool becomes on the bodies slightly thicker, sparser, and accordingly gains space to be twisted in tufts, but this does not depend on the climate. I admit I love the long, straight wool with the silver shine, and is always the finest in any case according to its fineness, and [the] shine should have been suited to light material; it is a special and very valued race, but it is not possible for me to handle both races, these so-called Saxon, and my Mimusch races, with the same attention, partiality and guaranteed purity. I believed to have done miracles, to have kept [retained] my race. This wool with straight threads is easily suitable, unlike the defect, where threads of wool, instead of remaining in parallel order, willingly grow crosswise and obliquely, which is a disadvantage for manufacturers in my view. With the improvement of the coarse-woolled ewes with fine-haired rams the phenomenon, that the finest flock of wool is composed of threads of varying thicknesses, through more generations, will remain strongly noticeable. Feeding [Nutrition] of sheep may have an important influence on appearance in wool production. A sheep, thus in full strength in Spring and is good and stout, will display wool, the thickness of which has appeared for the whole year. A sheep which is not found in perfect condition at that time, displays poor wool, and later,

following tending [nursing], nutritious feeding does not restore thickness, but extraordinarily elongated wool. Although none of this wool undergoes an alteration toward fineness [refinement], thus the eye, to which his ancestor [great-grandfather] is accustomed [familiarized] to fall, will explain the rubbish in return for [in favor of] finer. These would want the ones who select the breed-ram [*Stammwidder*], very often would become harmful. The one which is equally fine, but wool more closed, the elasticity is suited more in combination [blending], I would like to have observed [remarked].

The strength is not of the drawing together [tightening] of individual fibers, but rather strength, with which one tries to extend [spread out] strong, pressed balls again, is how I understand elasticity. From material, which is supposed to become pulled over a felt, elasticity is the highest necessity; just as injurious, where without felt, because of the warm luster alone, a shining surface similar to satin, is realized.

Notes: The author uses three different words here that could be translated as breed: *Race*, which does not appear in German dictionaries, *Stamm* and *Schlag*.

“Outlawed” sheep probably refers to Spanish merino sheep which were forbidden to be exported until some point in the 18<sup>th</sup> century, when Louis the XVI bought some [Oklahoma State University Department of Animal Science] to develop the Rambouillet breed mentioned by Festetics.

Translated by Rosanne D’Aprile Johnson February 2020

**Festetics, E. 1819. *Oekonomische Neuigkeiten und Verhandlungen* 22:169–170.**

61. Debatten. Schafzucht.

Weitere Erklärung des Herrn Grafen Emmerich Festetics über Inzucht.

(Verglichen Beilage Nr. 2 – 1819.)

Die Bemerkungen, mit welchen Herr R. André in der 4ten Beilage der Ökon. Neuigk. meine Erklärung über die Inzucht, selbst in der nächsten Blutverwandtschaft zu begleiten für gut fand, flossen aus jenem rastlosen Streben, nach welchem er jede wichtigere Streitfrage bis zur Evidenz beleuchtet wissen will. Gerne folge ich diesem Wink, und werde dort, wo ich vielleicht weniger verständlich geblieben, oder meine Meinung nicht erschöpfend sagte, das Nothwendige noch nachtragen. - Zuerst muß ich bitten, in der 2ten Beilage Sei le 20, Spalte links den §. 5. die 4te und 5te Zeile folgendermaßen zu lesen: „Abkömmlingen eine Aenderung fürsich gehet; oder waren die Vorältern nicht mit“ c. c. Diese 5 Paragraphen enthalten meiner Meinung nach, die genetischen Gesetze der Natur. Diese sind es, die bestritten werden müssen, sonst steht mein System. Denn ich sage in demselben

a, die Thiere von Gesundheit und robuster Konstitution pflanzen, und vererben ihre charakteristischen Eigenschaften fort.

b, Eigenschaften der Vorältern, welche von den Eishafen ihrer Nachkommen unterschieden sind, kommen in folgenden Generationen wieder zum Vorschein.

c, Den Thieren, welche durch viele Generationen die nämlichen sich angeeignete Eigenschaften besessen haben, fallen mit unter Abkömmlinge, die abweichen de Charactere haben. Dies sind Varietäten, Spiel der Natur, zur Fortpflanzung, wenn die Vererbung der Eigenschaften der Zweck ist, untauglich.

d, Bedingniß bleibt bei der Inzucht die scrupu löseste Auswahl \*) der Stammthiere. Nur jene, die die geforderten Eigenschaften in auffallendem Maß besitzen, können in der Inzucht Gutes wirken.

//\* - - ) Hiermit ist meines Erachtens der Hauptpunkt entschieden. Der Herausgeber.//

Nach diesen Prämissen komme ich immerhin auf jenen Satz zurück, daß wenn ich bei den Thieren eine besondere Eigenschaft festhalten, in der Descendenz vererben, und constant machen will, eine vorsichtig geführte Inzucht rathsam sey, ohne Gefahr zu laufen, daß organische Schwächung eine nothwendige Folge werden müsse. Die angeführten Analogien können mich nicht bereden, im mindesten von meiner Behauptung nachzugeben.

Schon erwähnte ich in meiner Erklärung, daß die Fortpflanzung des Menschen und der Tiere dem größten Unterschiede unterliegt, daß bei dem Menschen das Intellectuelle sehr ins Spiel trete. Aber ich frage: kann bei dem Menschen die Inzucht mit scrupulöser Beobachtung meiner Bedingnisse gehandhabt werden, besonders dort, wo Convenienz Schwächlinge zu sammeln verbindet, wo Herz und Sinn sich ewig fremd bleiben? Mein kräftiger Widder in seinem Harem ist gewiß in einer ganz anderen Lage, und doch fallen von ihm Lämmer, welche in der Inzucht den Stamm verderben würden. Bei Lämmern ist wohl ein Mittel, man hammelt sie. Was die Analogie von Pferden betrifft, so wahr als es ist, daß bei ihnen auf subtilere Eigenschaften Rücksicht genommen werden muß, als bei Schafen; so muß ich laut gestehen, daß das System der Kreuzung, unsere Pferde zucht im Grunde verdarb. Bei



dem Schaf hab ich zu berücksichtigen: Gesundheit und die Wolle. Bei dem Pferde – noch hat es kein Mensch rein und deutlich gesagt, was an einem Pferde gesucht werden soll. Ich glaube, des Pferdes Verdienst bestehe, nebst der Schönheit, in der Eigenschaft, dem Zweck zu entsprechen. Zu wie vielen verschiedenen Zwecken hat der Mensch die Pferde schon be stimmt! Und eben so verschieden muß der Pferdebau und Geist seyn. In dem Bau des Pferdes ist eine schwer zu ergründende Architectur verwebet: diese Maschine soll sich nun auch bewegen, fast ein jedes in einem andern Tempo, anderer Haltung, anderer oder leicht ändernder Richtung. Soll hier die Kreuzung des Heterogenen sein Glück machen? Gewiß nicht! dieß beweisen unsere Stutereyen, die, zum Glück eingegangen, und nun seit einem Decennio wieder regenerirt werden sollen. Herr Rath André giebt selbst zu, daß die Natur sich selbst gelassen, in ihren Bildungen sich getreuer bleibt hingegen bei der Civilisation und Hauszucht eo ipso eine Schwächung der Urkraft, und Disposition zur Schwächung des Organismus einzutreten pflege. Aber dieß werde ich nicht nur nicht bestreiten, sondern sogar als einen neuen Beweis anführen, daß der in dem Civilisations- und Geschäfts- Bande lebende Mensch sich sowohl für sich, als für seine Hausthiere möglichst der naturgemäßen Haushaltung nähern müsse. Ich sehe hier ein wildes Gestüt von 100 Stuten, 4–6 Hengsten. Der stärkste erkämpft sein Rodel, dann der schwächere. Die erkämpften Stuten halten getreu zu ihren Hengsten. Der schwächste bleibt sehr oft ohne oder mit ein paar verachteten Stuten. Der durch Generationen zum Pferdehüten hingewiesene Csi kös weiß sehr wohl, daß den stärksten Hengstfohlen auch organische Vorzüge anerben. Nur solche werden zur künftigen Generation beibehalten, und so ist dahier Inzucht. Eben so ist es bei unseren Gulen, so bei den Zigarros, und Zacklen. Der civilisirte Mensch ist leider in der Lage, das Wohlfeilste auch beherzigen zu müssen. Er kann nicht vom Mustern und Auswählen sprechen. Am Ende nahm er sich den Muth einen z. B. Stier zu kaufen. Wenn man schon kauft, so suchet man sich schon was besseres aus, ernährt es auch (des ausgelegten Capitals wegen) besser. Natürlich werden nun bessere Kälber fallen, doch keine solche, wie dort, wo bei vollem Futter, der Natur gemäß jener Stier aufwuchs. In jenen Ortschaften meines Vaterlandes wo die Viehzucht freier behandelt wird, werden die Stiere, welche wohl über Winter im Stall gehalten werden, im Frühjahr, bevor sie zu der Halte gelassen werden, zusammengelassen, damit sie sich abkämpfen; dort bestimmen sie unter sich den Rang. So mancher schöne Stier wird aus dem Felde geschlagen, alle übrige fielen über ihn, wenn er sich nahen wollte. Nach dortigen Grundsätzen wird ein solcher dem Fleischhauer verkauft. Diese Eigenschaft ist auch dem Schafwiehe eigen, wenn in eine Heerde von 3–400 Müttern 6 Widder gelassen werden; so erfuhr ich es allemal, daß der eine Widder oft von 10 Müttern begleitet wurde, während ein anderer kaum eine Braut sich erjagen konnte. Dieß alles zeuget für meinen Satz, daß so wie in der Natur, so bei unserer gesellschaftlichen Einrichtung nicht sowohl die Inzucht, als die übrigen Umstände die Degradation hervorbringen; daß aber die ausdauernde Aufmerksamkeit, die scrupulöseste Auswahl, in welche sich keine Vorliebe einmischt, große Ordnung in der Erziehung, in der Beobachtung der Lebhaftigkeit, Gesundheit, der Vorliebe, welche die Mütter äußern, die Sache sind, welche jedem, der nicht nebst der Leidenschaft auch Routine besitzt, beschwerlich fallen wird, fühle ich, und glaube, aus dieser Ursach nochmals sagen zu müssen, daß Inzucht unbedingt ja nicht zu rathen seyn.

Bei den Pflanzen ist die Befruchtung der weiblichen Blüthe dem Ohngefähr einer flatternden Mücke, eines Lüftchens ausgesetzt, selbst der Lage, dem Standorte, der Qualität des Bodens untergeordnet, daß wohl manche Varietäten hervorgebracht werden ohne daß der beste Gärtner sie bestimmt leiten, oder hindern könne.

Ich komme also auf meinen Satz zurück. Will man Eigenschaften in einem Stamm verewigen so darf man nie aus jener Race, welche dieselbe sich angeeignet hat, heraustreten. Um in solcher Race kräftige Generationen zu bilden, erziehe man die Thiere zur robusten Constitution. Der mit allen den

erwünschten Eigenschaften vorzüglich Ausgerüstete werde Stammva er. Wenn die Regeln getreu und genau erfüllt werden, so sey man getrost, die organische Schwäche folgt gewiß nicht. Freilich ist auch hier Bedingniß: in eigener Person, mit unermüdetem Eifer handle, wenn du es er“ fahren willst, was die Natur sich selbst als Regel vor geschrieben hat.

Festetics, E. 1819. *Economic News and Discussions* 22:169–170.

## 61 . Debates. Sheep Breeding.

## Further Declarations by. Count Emmerich von Festetics concerning Inbreeding

In the 4th edition of the *Agricultural News*, Mr. R. André accepted my observations on inbreeding even within closest blood relation, and this flowed out of his intense desire to examine each controversial problem for evidence.

I will gladly follow his example, and I will try to clarify that, which may have been misunderstood, or where I did not sufficiently explain myself. But first, I have to request that in the 2. insert ,page 20, in the right side column , in paragraph 5, the 4th and 5th lines should be read gender appropriate :

“ ....descendants undergo a change ; or their predecessors not with...”

c.c. In my opinion, these five paragraphs contain the genetic laws of Nature. These are the ones that have to be contested, for the rest my system is firm, because I there declare:

- a) animals of healthy and robust constitution possess and pass on the characteristic traits
- b.) characteristics of the predecessor, which are different from those of their progeny, appear again in future generations.
- c.) those animals, that through many generations show the same inherited characteristics, are among the progeny that shows divergent characteristics. These are varieties, a game of Nature, and they are unfit for breeding when the inheriting of certain traits are the purpose.
- d.) important in the inbreeding will always be the scrupulous choice of the stock animal. Only those that show an abundant amount of the desired characteristics , can be of great value for inbreeding. \*

//\* ) In my opinion, this underlines the main point. The Publisher //

After these premises, I will however return to the statement, that if I want to continue a certain characteristic in the animals, to have their progeny inherit and continue it, then a carefully executed inbreeding is to be recommended, without encountering the danger that an organic weakness would be the necessary consequence. The quoted analogs will not be sufficient to make me abandon my convictions.

I already mentioned, that in the propagation of humans and that of animals, there are great differences, that among human's intelligence plays a big role. But I am asking whether among humans inbreeding would be possible by scrupulously observing my conditions? Especially in cases where weaklings congregate, where heart and mind are forever separate. My robust ram is certainly in quite a different position among his harem, and even then, he can produce lambs which by inbreeding would spoil the race. With these lambs there exists a solution - they will end up mutttons. As to the analogy where horses are concerned, I realize that more suitable characteristics than those of sheep have to be considered, but I have to loudly proclaim that the system of inbreeding basically ruined our horse breeding operation. With the sheep I have to consider health and wool. For the horse - no person has yet clearly and understandably pronounced what is being sought in a horse. I believe that, aside from its usefulness and service. beauty is a factor. How many different uses we humans have asked the horse to fulfill. And horse breeding and the purpose thereof should be equally diversified. The structure of the horse is a manifold architecture that is difficult to fully understand. This horse machine will have to be mobile, each would move to its own tempo, in its own way, in this or that changing direction. Could here, the cross breeding of heterogeneous ones be the lucky way? Certainly not! This was demonstrated with our mare breeding, which had died off during the last few decades, but which is now being reestablished. Mr. Rath Andre himself admits that, if Nature is left to its own devices, it remains truer to its creations, whereas with civilization and farm breeding the basic power is weakened, and a disposition for a weakness of the organisms shows up. This I not only refuse to negate, I will bring a new example for the conviction that Man, enslaved by civilization and business deals, has to get close again to a natural way of life, both in his household, as also in the treatment of his animals. I have here a naturally wild stud farm of 100 mares, and 4-6 stallions. The strongest gathers his mares, then the weaker ones get their turn. The chosen mares remain faithful to their stallions. The weakest often remains without mares, or with those that were not chosen by the other stallions. The Csikoses, trained through generations in the trade of herding horses, knows that the strongest stallion colts have inherited the organic preferences. Only these will be kept on for the next generation, and this then is inbreeding. The same goes for our Gulen (?) as well as for the Zigarros and Zacklen. The civilized person often sadly finds himself in the unfortunate position to have to accept the cheapest thing. He cannot speak of samples and choices. In the end, he took heart and bought a steer for example. If one already has to buy, then one would choose something better, since, aside from the spent money, it also nourishes more. Naturally, better calves would be born, but not as good ones as those from the steer(bull) that grew naturally and with better rations. Traditionally, in villages of my homeland where cattle breeding is done in the natural way, steers(bulls) who had been kept in the stables during the winter, will be kept together during the Spring before they are set free for grazing, so that they can fight among each other, thus determining their standing in the herd. Quite a few good steers(bulls) are sidelined this way, chased by the others whenever he dared to approach. The norm then would be to sell that animal to a butcher.

These characteristics can also be found among the sheep, where for a herd of three to four hundred sheep 6 rams would be added. I experienced that one ram was followed by 10 sheep, while another had barely one. This all underlines my opinion, that in Nature as much as in our civilized Life, not Inbreeding, but rather other circumstances determine the degradation. However, that constant alertness, scrupulous choice without prejudices, a great education system, and the traits of vivacity, health, and mother love will be hard to achieve for those, who do not possess passion and routine, and I feel and want to say once more, that inbreeding is definitely not to be advised.

Among the plants, fertilization of the female flower is achieved with the flutter of a moth wing, a breeze; even the placement, location and the quality of the soil play a role; many varieties are created thus, and the best gardener cannot make or hinder that.

I therefore return to my belief that if one wants to maintain the characteristics of a stock, then one should never leave the breed from which the traits came. In order to obtain strong generations of this breed, the animals have to be raised to have a strong constitution. The one who has the best of all the desired traits will become the stud father. When all the rules have been truly and faithfully followed, one may be assured that there will be no organic weakness side effect.

Naturally there is one more condition, you yourself will have to work with tireless effort to experience Nature's own prescribed rules.

**Festetics E. 1820. *Oekonomische Neuigkeiten und Verhandlungen* 4(19):25–27**

## 12. Mittheilungen der k. k. mährisch-schlesischen Ackerbau-Gesellschaft.

Bericht des Herrn Grafen Emmerich Festetics als Repräsentanten des Schaf Züchter - Vereins im Eifenburger Comitete.

Hochverehrte Gesellschaft!

Um meiner Pflicht, als Repräsentant für diese Gegenden nachzuleben, übergebe ich meine Bemerkungen über die Fortschritte der Wollveredlung, so wie über den Geist, der in diesem Geschäft der vorherrschende ist. - Der Wille die Wolle zu veredeln, ist allgemein geworden. Auch die Ueberzeugung, daß dies gutmüthige, des Landwirths Aufsicht am stärksten lohnende Thier besser genährt und verwahrt werden soll, greift um sich. Diesem zu Liebe der Futterbau. Daß bei Erbauung der Schafftallungen nicht bloß auf Reinlichkeit, und hinlängliche Luft oder andere Gemächlichkeit, sondern in hiesiger Gegend auch auf Eleganz, ja anderwärts sogar auf Luxus gesehen wird, zeigt, daß der schafzüchterische Zeitgeist an der Tagesordnung ist. So sah ich einen Schafftall, in welchem eine \*heilung, für die Lämmerung bestimmt, außer Fenstern, auch noch mit Laden versehen war, vermuthlich das "den Kindsbetterinnen das zu viele Licht nicht scha " möge. Immerhin für Herrn, die einige 100 fl. \* verschmerzen können. Im Ganzen ist aber "Ädlig, das in diesem Jahre, wo der Geldman "dend gefühlt wird, wo die Wollenpreise so auf Wend sagten, die Anschaffung der Stöhre allgemein, jene der Mütter aber an vielen Oertern stärker als je bemerkbar geworden. Das klassische Werk des Verwalters Rudolph André über die Wollveredlung ist verbreitet, seine Grundsätze angenommen und eingeführt worden. Die individuelle Paarung ist in so manchen, auf höherer Stufe der Veredlung stehenden Heerden eingeführt. Die Herr selbst sieht man mit den Registern beschäftigt. Ich weiß mehrere, welche dem Rath, Stammheerden anzuschaffen, folgend, beträchtliche Summen Geldes auf Mütter und Widders ausgegeben haben. Alle Höfe, die einen Ruf sich zu erwerben Gelegenheit hatten, werden es bestätigen, daß man Mütter (zu Stammheerden) sammelte. Auch weiß ich Beflissene, die, wenn sie aus dem Auslande hergetriebene Thiere, welche für acht spanisch gelten, und ihre Aechtheit mit Documenten und Siegel beurkunden, zu dem Stamm zu erkaufen Gelegenheit fanden, sich überaus glücklich schätzen. Nicht sowohl in meiner nächsten Umgebung, als in den Gegenden jen seits der Donau, der Theiß, der Marosch, an Siebenbürgens Gränze, selbst in Siebenbürgen in Gegenden, wo vorher gar keine, oder nur schlechtwollige Zackel - Schafe gehalten worden, sind nun feine Schafzuchten Heerden von Taufenden, von ziemlich veredelter Wolle. - . Die Frage, ob alle diese Herren selbst oder ihre Beamte hinlängliche Kenntnisse über die Eigenschaften der Wolle und ob sie gute Einkäufe gemacht haben, beantworte ich folgendermaßen. Jene Herrn, die zu den 1000 Müttern zur Veredlung Widder kaufen,“ bekommen doch hie und da kaufend immer einen vorzüglichen, und dann noch einige Stücke, die in ihrer Heerde nichts verderben. Sie kaufen auch gewöhnlich aus mehreren Heerden, und so können sie noch an den gekauften verschiedenen Thieren ihre Sinne üben, und sich ein System machen, nach welchem sie arbeiten wollen. Jene Herren, die Stämme sich angeschafft haben, dürften aber leichter zu Schaden kommen, wofern sie nicht mit besonderer Fähigkeit wählten. Mir scheint, daß um diesem Uebel auszuweichen, die meisten aus allen Höfen etwas zusammentragen. Diese haben wahre Muttercharten, wo man sich Rathser“ holen kann, wenn man sonst nicht weiß, in welchem Hof, welchen Wolle, welche Thiere zu finden seyen. Ob sie nun in jedem Schlag die Innzucht treiben, oder durch Kreuzung die gegenseitigen Mängel verbessern wollen, wird wohl die Zukunft entscheiden. Was ich zu sehen Gelegenheit hatte, ist eine sehr gemischte Waare an welcher man auch deutlich sieht, daß die Inhaber des guten Viehes das Bessere nicht überlassen." Aber adß auch die Moden oder Liebhabereien

die zum Ankauf be vollmächtigten Beamten verblenden, ist leider noch wahr. Diesen vorzüglich beflissenen zu Lieb, sey mir erlaubt, meine unmaßgebliche Meinung hier mitzutheilen. Wenn ich von der Brünner Versammlung zu Haus komme, so glaubt man es mir nicht, wenn ich standhaft die Wahrheit behaupte, daß in Brünn dem besten Stück kein Prämium zuerkannt werde, daß keine Lizitation statt finde, daß man mit seinem Vieh nicht pro locis certire, daß ein Geisler, Lamberg und andere ihre zur Beschau gebrachten Thiere selten - oder nie verkaufen, sondern daß man in ihren Höfen hand das Äabholen müsse. Wenn die Verungen unseres Vereines die Schafzüchtler aus ferneren Gegenden nach Brünn locken, wenn eben diese Verhandlungen den Eifer der Landwirthe rege gemacht haben, wenn die wissenschaftlichen Debatten, die Weise der Verhandlungen, die Vereinigung so vieler, und würdiger Wollerzeuger, Wollhändler und Wollfabrikanten, und selbst die Uebung der Beschaucommission das Zutrauen der minder ausgebildeten Wollzüchtler gewonnen hat; so ist es Zeit, daß der Verein ganz entspreche. Nachdem, was ich in täglichem Umgange mit den Wollveredlungseifigen bemerke, finde ich nicht, daß sie von dem Eigendünkel „irre geführt sind - als verstünden sie dies Geschäft besser – nein! Sie wüßten schon aber alle, daß in Brünn gewürdigte Thiere auch dort verkauft würden, am Liebsten auf einer Lizitation. - Es wird in der Veredlungs- Wissenschaft Epoche machen, daß Anno 1819 eine mathematische Bestimmung und Benennung der Wolle - Feinheits-Grade ausgemittelt wurde. Noch bleiben, meiner Einsicht nachfolgende mathematisch zu bestimmende Eigenschaften übrig: Die Ausgeglichenheit, die Elasticität und der Nerv, bei gleicher Feinheit der prima-Wolle, \*) Die übrigen sind viel zu leicht jedem Auge bemerkbar, und scheinen mehr Sache der Liebhaberei zu seyn. Zu den ersten rechne ich Dichtheit und die Sanftheit des Vlieses; zu den letzteren das weiße Fett, Länge der Wolle c. Sind nun diese Eigenschaften so bestimmt, daß mit einer Chiffre, oder einem Wort die bestimmte Ider der graduellen Eigenschaft auch ausgedrückt, ganzer schöpfend ausgesprochen werden kann; was hindert den Vereinkund zu thun, daß künftig bei Gelegenheit der Schafauftellung, Thiere unter dem Schutz des Vereines licitando verkauft werden sollen? Zu sagen, daß alle Thiere, die unter dieser Firma sollen verkauft werden, von der beeideten Commission gewürdiget, die Würdigung allogleich durch einen Protokollsextrakt dem Verkäufer eingehandiget, und zur Einsicht der lizitirenden Herren hinausgegeben werden soll? Zu sagen, daß der Verein nur vollkommene, also nur Thiere von den 6 oder wie vielen „Klassen zur Lizitation zulassen könne ??) - \* Ich kenne zwar die Privatabsichten der vorzüglichsten Schafzüchtler nicht, aber ich zweifle, daß einer seine Thiere über ihren wahren Werth den Käufern, wie man sagt, aufhängen wolle; ich hoffe, sie sehen alle ein, wie durch eine vortheilhafte Würdigung der Ruf sich auch auf diese anerkannte Autorität stützend zunehmen wird; „wie der Zulauf von den Veredlern die ebenso geschickt geleitete, als kostspielige Erlangung der Vollkommenheit zu belohnen sich beeilen, aber auch (was sehr Noth thut) von solchen Käufen abgeleitet werden, wo sie nebst Geld und Zeitverlust, auch die Liebe zur guten Sache verlieren. Darf ich für meine Person einen ganz herzlichen, aber ohne alle Gängelung gemachten Vorschlag damit unterstützen, daß ich mich erkläre, bei künftiger Auftellung auch etwas von meinem Wiehe hinzustellen, mit dem ehrfurchts vollen Anerbieten, daß , da ich von diesen, nicht ohne Unkosten möglichen Anstalten so vielen Nutzen genießen habe, ich meines ersten auf solcher Lizitation veräußerten Widders Werth dem aufblühenden Franzens Museo widmen dürfe ?

Patty, den 15. Okt. 1819.

Ihr ganzergebener Diener, Graf Emmerich Festetics,

als Repräsentant für das Eisenburger Comita

**Festetics E. 1820. *Economic News and Discussions* 4(19):25–27**

12. Contributions of the Royal Moravian/Silesian Agronomy Association.

Count Emmerich Festetics' Report as the Representative of the Sheepbreeders Association of the Eisenburg Committee

Highly esteemed Associates!

In fulfillment of my duties as the representative of this region, I will present my observations of the developments in the field of wool improvement and the spirit that governs this business. The desire to improve the wool quality is omnipresent. Also, the knowledge that this gentle, agriculturally most profitable animal is in need of better fodder and improved shelter, has become more prevalent. Therefore, the preference for the fodder-shelter. This means that the construction of sheep stables does not only mean cleanliness, sufficient ventilation and other comforts, but that in some areas it almost borders on elegance, at times even luxury. It demonstrates that sheep breeding is now quite up to date. For example, I saw a sheep pen destined for lambing, where there were not only windows, but they even sported window shades, in the thought that too much light might be injurious to the lambing mothers. This, I assume, are sheep owners who can generously spend some 100 Florins (Hungarian money) for this. In general, since this year was financially good, and the value of wool rose, also the installation of these pens, especially for the lambing, has been seen more frequently in many regions. Administrator Rudolph Andre's classic work about the improvement of wool is everywhere, and his theories have been accepted and followed. The individual coupling has been followed in many, highly improved herds. One sees the owners themselves busily checking the breed registers. I know of quite a few, who were eager to establish cognate herds, and who spent large sums for rams and brood sheep. All agricultural establishments of renown will say that they collect sheep for cognate herds [Stammheerden]. I also know of some enthusiasts who count themselves especially lucky after buying foreign, imported, genuine Spanish sheep with provenance documents, and then adding them to their herds. Not only in my area, but also in regions on the other side of the Donau, in the Theis-, Marosch-, and Siebenbuergen Frontier region, where once upon a time one found none, or only a few Zackel sheep with bad wool, one can now encounter fine flocks of a thousand animals with fairly improved wool.

The question whether these owners and their employees possess adequate knowledge about the characteristics of the wool, and whether their acquisitions were valuable, prompts me to say the following. These gentlemen who buy rams for the improvement of a herd of 1000 sheep, will get one or two excellent rams and a few mediocre ones that however will not harm their herd. They generally also buy animals from different herds, and so they can experiment and find a system for future work. Those gentlemen that bought breeds can easily run into trouble if they don't wisely choose the characteristics. It seems to me that, in order to avoid trouble, buying from various farms would be the better road. They have true breeding registers that one can consult if one does not know which establishment has a certain type of animal with a certain type of wool. Whether they practice inbreeding, or whether they try to mitigate any bad traits by cross breeding, the future will show. What I saw, was a mixed lot in which one realized that the owners of the animals not always chose the best way. Also, that the trends and personal preferences often misled the officials. To this point I would like to add my humble opinion. After my return from the Bruenner Reunion I was met with doubt, because I steadfastly held to the truth that in Bruenn the prize was not given to the best animal, that there was



no license given out, and that one could not get the animal on the spot, but that people like Geisler, Lamberg, and others rarely or never sold the animals they brought to the show - one had to visit their farms to obtain them there.

When the merits of our Association brought sheep breeders from far-away regions to Bruenn - when the debate has kindled the interest of the farmers -when the scientific papers, the way of the negotiations, the assembly of so many and distinguished wool producers, wool traders and wool manufacturers, and even the commission of judges - if all this has produced confidence among the less educated wool producers, then it is time for the Association to take a stand. According to what I experienced in daily contact with the busy wool producers, they were not led astray by vanity and the feeling that they knew better, no! But they all wished that the animals that won prizes in Bruenn should also be sold right there, preferably with a license. It will be a milestone in the science of refinement, that in the year 1819 a mathematical definition and naming of the grades of wool fineness was established. But, according to my insights, a few other characteristics remain to be mathematically ordered: the smoothness, the elasticity, and the resilience in equal fineness of prime wool. \*) The rest is easily seen by looking at them, and they seem to be more a question of preference. Among the first, I count the denseness and softness of the fleece; among the latter, the white fat, and the length of the wool.

If the characteristics are so distinct that they can be named with a number or a word that creatively expresses the idea of the gradual character, what then hinders the Association to, in the future, sell animals under the license of the Association during sheep trade shows. This will mean that all animals sold by this outfit would be judged by a sworn commission, and would be given to the new owner with a certificate issued by the licensed gentlemen. Will this mean that the Association will admit only perfect I.e. animals of class 6 or also many other classes for licensing?

\*) I do not know the private goals of the excellent sheep breeders, but I doubt that they would trick purchasers into buying their animals for more than they are worth. They all realize that it is to their advantage to dignify the reputation of the acknowledged authorities. They will rush to join the trend of improvement of the skillfully led and expensive attainment of perfection where they will find their reward. But also (and this is necessary) to stay away from those purchases where they will not only lose time and money, but also the love for a good undertaking. May I, for myself, but without any personal vanity, make a very heartfelt suggestion. I want to exhibit some of my own livestock at some future exhibition of this Association that has been so useful for me, and I will donate the proceeds of the sale of the first of my licensed rams to the Franzens Museum.

Patty, Oct. 15, 1819

Your very respectful servant, Count Emmerich Festetics As Representative of the Eisenburg Committee

**Festetics E. 1820. *Oekonomische Neuigkeiten und Verhandlungen* 15(20):115–119.**

## 2. Aeüßerung des Herrn Grafen Festetics.

Endesunterfchriebener hat die Ehre gehabt, dem hochverehrten Vereine feine Gedanken mitzutheilen, wie in der Auffindung, in der wissenschaftlichen Bestimmung und endlich gleichzeitig anzunehmender Benennung aller Eigenschaften, die eine vollkommene Wolle besitzen muß, nach dem Anfang, der bei der Bestimmung der Feinheit gemacht worden, ferner fürzuschreiten wäre. Der hochverehrte Verein verwies mich vor der Hand, des Hrn. Staatsrath Thaer Gutachten abzuwarten. In Nr. 12. und 13. des 19ten Bandes der Oekonomischen Neuigk. ist Herrn Staatsraths T. haer Aeüßerung enthalten. Wenn ich eile, sowohl zu diesem wichtigen Auffas als auch zu des Hrn. Sekretär und Raths André Bemerkungen meine individuellen Ansichten anzuschließen, so sey es Beweis eines Bestrebens, diesen wichtigen Zweig der agronomischen Kenntnisse bestens zu fördern.

1mum. Daß der Verein bei der Wahl der Namen Rücksicht darauf nehmen müsse, ob und welche Begriffe Wollhändler und Fabrikanten schon mit gewöhnlichen Worten ausdrücken pflegen, und bei ihnen schon in Sprachgebrauch gekommen sind, ist höchst wahr. 1) Um so mehr, als der Verein erst eine Eigenschaft von allem andern vor der Hand abgefehen, benennen wollte. Sehr passend hat Staatsrath Thaer angeführt, daß der Wollhändler ihm sagen konnte: die Wolle habe den Charakter der Electoral-Wolle, ohne Electa zu seyn. Doch dünkt ich soll der Verein hierin auch nicht gar zu nachgiebig seyn. Wir haben Beispiele, daß wissenschaftliche Gesellschaften, ohne Vorurtheil und mit Sachkenntniß ausgerüstet, den praktischen Menschen belehrt haben, daß also der in der Wollkenntniß noch nirgends übertroffene Verein fortschreiten, die Eigenschaften auffinden, jede benennen, das Aggregat dieser mindern oder größern Vollkommenheiten zusammenstellen, und selbes mit Belegen aufstellen müsse. So werden unsere Wollhändler erst aufgeklärt, unsere Fabrikanten werden es sagen können, was sie gleichsam ahndend fühlten, in der Arbeit fanden, ohne darüber feste Ideen zu besitzen; so werden die Producenten die Eigenschaften der Wolle auch nach einem Maßstab einzeln und im Aggregat erkennen, und der Verein wird Vergnügen schöpfen, daß er des Wollhändlers Ideen geordnet, und beleuchtet; des Fabrikanten physisches Gefühl wissenschaftlich unterstützt; und des Schafzüchters rastloses Streben, eine nach klaren Regeln einzuleitende Tendenz bekommen hat; die unsichtige, klar, sich so logisch ausdrückende Sprache des Staatsrath Thaer, und seine wohlwollende Theilnahme an unserer Beflissenheit wird zu unserem Zwecke sehr befördernd mitwirken.

2dum. Will ich nur bemerken: daß, obwohl es wahr sey, daß nicht jede Wolle zu jedem Fabrikat die taugliche sey, also der Produzent in der Lage seyn kann, von dem Fabrikanten abzuhängen, hier nicht von den möglichen Umständen des Produzenten die Rede sey. Es handelt sich zu bestimmen: welche Eigenschaften muß die vollkommenste Wolle haben? Haben diese Eigenschaften jede für sich Abstufungen? Wie kann man diese Eigenschaften, jede einzeln in ihren mathematischen Abstufungen nach einer wissenschaftlichen Terminologie benennen? Endlich sind drei Fragen noch die wichtigsten: Sind diese Eigenschaften in ihrer höchsten (in soweit sie einzeln in Natura vorkommen) Stufe vereinigt zu finden? oder sind manche ihrer Eigenschaften, und welche, die eines das andere auszuschließen scheinen? Die Zweite ist: Wenn die Eigenschaften im höchsten Grade nicht zu vereinigen wären, sollte man zwischen Wollcharakter und Charakter Unterschied machen? gleich zwei Wollgattungen z. B. Escurial und Regretti als Anhaltspunkt zur ferneren Untersuchung annehmen; oder ferners behaupten: keine Wollevollkommenheit, sie sey dann Escurial? Hier erst würde dann der Verein berechtigt seyn, zu untersuchen, welches Aggregat von Eigenschaften für dieses oder jenes Fabrikat das Ersprießlichste

sey? Darauf würde folgen, welche Wolle zu ziehen, in gegebenen Umständen, dem Landwirth in seinen pecuniären Rückfichten am zuträglichsten sey.

3tium. 4tums5tum. 6tum. Ich glaube nicht, daß dem Hrn. Staatsrath hier einfiel zu behaupten, daß eine gutgeartete, höchst feine Wolle der Forderung des Fein Tuchfabrikanten nicht entspreche. Es will mir einleuchten, daß zu der 3ten Bemerkung nur so viel gefagt worden, daß nicht die Charaktere der Wolle, aber der aus einer Parthie feiner Wolle ausgefuchter Theil, der z. B. zu einer Kammwolle am tauglichsten wäre, Electa heiße: ad 4tum will es auch schwerlich anders bedeu- ten, als daß die feinste Wolle wegen Mangel an an derweitigen und höchst nothwendigen, oder gar wegen den, diese Wolle herabsetzenden Eigenschaften in die tertia könnte rangirt werden, obwohl des Fadens Dicke selbe zu den feinsten zuzählt. Durch Beispiele sollte der Satz nur aufgeklärt werden, und andeuten, daß, um mit dem Sprachgebrauch der Fabrikanten und Wollfortirer in keine Collision zu treten, die bloße Feinheit von den übrigen Eigenschaften isolirt ge dacht, noch nicht Electa genannt hätte werden sollen. Daß Wollen, besonders diejenigen, die viele Gläte -haben, am wenigsten ein geschlossenes Vließ darstellen, daß das offene End solcher Wolle, im ewigen Mangel an Fette wachse, sobald so ein Thier der Luft, Regen ausgesetzt ist, und daß diese Ende ihren Nerv so verlieren, daß sie wie halb angebrannt brechen, reißen, ist an diesen Thieren eine in U u gar n erprobte Sache. Ich glaube die sehr kenntnißreichen Anmerkungen des Hrn. André sind Gegenstand der ferneren Arbeit, welche der Verein in Bestimmung der übrigen Eigenschaften zu erörtern haben wird. Doch will ich schon ist diesem würdigen Freund meine Bemerkungen mittheilen zu dem Gefagten, ad 6tum. Ganz anders aber c. der Herr Verfasser dieser Anmerkungen giebt klar die Meinung von sich, daß die Wollenspitzen jener Thiere, welche gerne das dunklere sich mit der Zeit schwärzlich färbende, harzige Wesen haben, durch eben diese Kruste ihrer brauchbaren Eigenschaften beraubt würden. Ich gestehe zwar, daß diese Spitzen wohl etwas an ihrer Vollkommenheit leiden, ; aber nicht des sich dort sam- melnden Fetts wegen, sondern weil sie dort abtrocknen und dadurch die Wolle selbst spröde wird. Groß ist doch dessen Vortheil an dem Reste der Wolle, weil! den Pelz schließen hilft, und in der übrigen, stämmigen, geschlossenen Wolle das Fett sammelt, das G° dringen des Staubes, der Sonnenstrahlen hindert. Ich möchte fast behaupten, daß für wandernde Scha- (trans humane) oder solche, welche bei uns den wandern den ähnlich, die meiste Zeit sich selbst im Frie- Nahrung suchen müssen, sey diese Eigenschaft ein s dürftig, sine qua non. In Spanien mögen die estantes, oder in kleinern Heerden bei Haus gehalten so wie bei uns die in vorzüglichen Meiereien gehaltene wohl auch ein minder geschlossenes, und ohne Kruste erscheinendes Vließ tragen, wofern sie vor Regen, schnell darauf wirkender Sonnenhitze, c- ver- bleiben können, und doch sah ich nicht selten die bei starker Fütterung im Stall gefütterte Schafe in deren Wolle ein 3ter Theil am Körper rein, der 2te t° schmusig, und das äußerste Ende staublos, aber auf ohne alles Fett angetroffen wird. Ich kenne eine Heerde, welche auch bei dem Vereine bekannt ist, welche eine wahre Electoralwolle hat, uns mißt, und deren äußerer Theil, weil die Heerde, ländlich sittlich, das ganze Jahr dem Regen, Wind und brennenden Sonnenstrahlen ausgesetzt wird, alle Kraft verloren hat, und wie halb verbrannt zwischen den Fingern bricht. \*) Diese meine Bemerkung wird später vorkommend mich

//\*War es nicht diese Erfahrung, welche die Meister, unsere vorleuchtende Schafzüchter bewog, – diesen auf feinen obwohl beschränkten Hutweiden Schuppen zu bauen, wo die auserwählten bei Sonnenhitze, so wie bei feuchter Witterung eingestellt werden mußten einen zweiten feinen Schafe sogar zu bekleiden, den dritten eine im- währende Stallfütterung einzuführen?//

auf eine Vermuthung verleiten. Alles übrige ist aus meiner Seele gesprochen, aber weicht von der Thesis ab. ad 7mum. Ganz einverstanden: ad 8vum. Ob wohl ich des Hrn. Staatsrath Th a e r Urtheil nicht auslegen will, so scheint mir doch mein Freund An dré in den Folgerungen zu weit zu gehen. Wenn das Urtheil nach Muster die 1. und 2. für vollkommene Electa erklärt, so mögen nebst Feinheit auch die übrigen wahrgenommenen Eigenschaften zur Bestimmung bei“ getragen haben. Ferner scheint mir, daß Hr. Staats rath auch keinen Wunsch noch geäußert hat, daß nur zwei Stufen hoher, zwei Stufen folgender Wollen c. der Maßstab der Feinheits-Abstufungen werden. Aber des englischen Wollhändlers eigends angeführte Worte gaben einen deutlichen Wink, daß es bei jedem Cha° tacter der Wolle eine auserlesene, eine Electa gebe sogar in der Electoralwolle eine Electa erst zu forti ren sey, und sagte fogleich, daß hiezu nebst der ho“ hen Feinheit noch Eigenschaften nothwendig seyen, ohne welche die höchstfeine Flocken noch in die Terzera ge worfen werden dürften. Da des Herrn Verwalter Rudolph A. n dré Messungen an Micrometer alle sächsischen Wollmuster in die Klasse srsz setzten, die Muster Nr. 1. zsz und 2. gr°ss maßen, so würden wir scheinen uns anzumassen alle sächsische Wollen aus der Klasse der Electen auszuschließen, und hätten de facto bei allen Wollhändlern und Fabrikanten unsern Prozeß verloren. Ad 9num. nichts einzuwenden. Ad 10mum. Herr Staatsrath spricht logisch, klar. Ich fasse folgendermaßen den Sinn: ächt Merinos oder Spanisch kann ein Vließ nebst hoher Feinheit ein höchst gedrängtes Haar besitzen, welches voll Kraft ist, und daher im Angriff etwas barisch, hart zu seyn scheint, bei solcher liegt der Faden so gedrängt und gekraußt, daß sie kurz erscheint, obwohl ausgedehnt selbe die hinlängliche Länge erhält: diesen Wollen - Charakter habe Hr. Staatsrath, wenn auch diese Idee nur ab strakt wäre, Negretti geheißten. Eben so ächt Merinos oder Spanisch - Vieh kann ein Vließ haben, welches eben so feine Wolle habend, kein so gedrängtes Haar hat, hingegen ein längeres Ansehen im Vließ habend bei der Betaftung ein eigenes, sanftes, weiches G.fü hat – dies sey eben in hohem Gradessuria Ich bin mit des Hrn. André Bemerkungen ganz einverstanden: nur bei der dritten hätte ich gewünscht, daß man nicht die charakteristische Merkmale auf Fett und Feinheits- Disposition einzuschränken scheine. Unmaßgeblich scheint mir vielmehr, daß hier der Ort wäre zur Stimme zu bringen, daß der Verein sich durch viele Umstände bewogen, als Grundsatz annehmen sollte, daß die zwei Extreme ihre eigene Na men haben sollen; daß jede dieser Racen unterschieden werde, durch ein Aggregat eigener benannter Eigen“ schaften, daß in jeder Race also etwas bis itzt bekannt gewordenes, vollkommenstes und bei welchen Zusammen stellungen vorhanden sey dies zu erörtern, ohne Scheidung dieser Racen, war ohne Irrthümer in Ideen und Sprache unmöglich; diese Abtheilung der Ideen wird den gewünschten Fortschritt in der höhern Schafkunde Dann wird der Schafzüchtler seiner individuellen Lage gemäß sich ein Ziel ausstecken, und zu dessen Erreichung sichere Mittel ergreifen köns nen. Ob zwischen beiden Extremen der Verein von den aus ihrer Mischung allenfalls entstandenen Erfcheinungen eine zu einer neuen Stufe machen, und als solche behandeln wolle, muß die Erfahrung lehren wenn nämlich dieser neue Charakter der Wolle in der Heerde kann constant und vorherrschend erhalten werden. ad 11mum. Der ganze Paragraph ist wichtig, oft ist er und immer ziemlich mit ähnlichem Resultat erörtert worden. Gehört aber auf einen anderen Platz: itzt ist die Frage über die Terminologie der Wolle-Eigenschaften, und ob das Wort Glecta den in folirten Begriff F ein? heit soll ausdrücken. ad 12mum. Dieses Paragraphs Eingang ist voll von den wichtigsten Sätzen, ich mache folgenden Auszug aus selbem. 1mo. Daß die hochfeine Escurial- Wolle nur zur Verfertigung ganz dünner Zeuge; die Negretti Wolle hingegen zur Erzeugung der Tücher vorzüglich eigne. 2do. Daß Hrn. Staatsraths Erfahrung gemäß, das die Eseurial - Wolle tragende Schaf eines höchst zarten Schlages sey. 3tio. Daß also die Erzeugung und Erhaltung solcher Heerden mit vielen Schwierigkeiten verbunden, ihre allzugroße Vermehrung von selbst verhindern werde. 4to. Daß die gefuchte höchste Feinheit eine Gränze haben müsse, sowohl weil die Wolle sich nicht mehr aufrechtstehend erhalten, sondern sich legen würde, als auch, weil bei diesen Thieren eine Schwäche und Kränklichkeit zu bemerken ist, so zwar, daß sie nur bei äußerst sorgfältiger Wartung und Körnerfütterung erhalten werden können. 5to. Gibt er

Lehren, wie durch Mischung des Blutes dieser Fehler einigermaßen ausgebeffert werden könne. Mit Herrn André rufe ich auch aus: viel wichtiges! Funken und Flammen brechen aus, wenn man diese Säe mit Bemerkungen begleiten will. Der erste Satz ist von mir in meinem Aufsatz über die Inn, zucht schon behauptet worden. Daß Hr. Staatsrath Thaler dies nun wiederholt, so darf ich abermals den Race-Verein erinnern, daß ich hoffe früher mit der Wolle Klaffication fertig zu werden, wenn wir zwei oder gar drei Racen annehmen, Regretti, vielleicht Quadeloupe und Escorial; denn, es können in allen Dingen gleich feine (sage feinste) Wollen mit vollständig verschiedenen Characteren erscheinen; zu dem zwei ten Satz erlaube ich mir eine Vermuthung, welche durch hierländige Erfahrungen bestätigt zu seyn scheint. Diese sogenannte Gseurial oder sächsishe Wolle ist nichts anders, als Wolle, wie sie bei den in Spanien, die Rechte der Meista nicht besitzenden, und außerdem beweidungspflichtigen Terrain gelegenen emlige Spanier sich zugezogen haben mögen. Aus den Merinos trans humantes wurden gewählte Stücke zu estantes, und so ähnlich der mährischen halben Stallfütterung gemähtet, stark genährt, und bei Auswahl der Böcke auf Länge, in die Augen fallende Feinheit, vielleicht auf Glanz der Wolle gesehen. Auch hier zu Land sah man bei der Auswahl der Böcke auf diese Eigenschaften - und in der 3ten, 4ten Generation hatte man eine Zuzucht, die nicht mehr das Gewicht lieferte, welches man gewohnt war zu scheeren, und bei etwas verfaumter Wartung nackte Bäuche, eine spinnende, ja sogar bei karg gefütterten Schafen, das Abstoßen des ganzen Vlieses zur nachtheiligsten Folge hatte. Wenn die Herrn aber rein die Wahrheit aussprechen wollten, welche das Auffrischen des Blutes anriethen, gewiß müßte der Verein sich überzeugen, daß sie entweder ihre Böcke an Mann bringen wollten, oder selbst durch obige Umstände zur Auffrischung gezwungen, dies Mittel als höchst nothwendig jedermann gutmüthig anriethen. Diese Escorial. Wolle ist aber, wenn sie noch Nerv oder Stärke besitzt, ein Product, welches zu neu erfundenem, und nun zu Bedürfniß gewordenem Fabrikat nothwendig ist, al so ihre Cultivirung wo eine unausgesetzte, äußerst sorgfältige Wartung, einem jeden Stück gegeben, werden kann, wohl anzurathen. Doch, da die Millionen Schafe, die der österreichische Staat ernähren könnte solcher Wartung sich nicht erfreuen könnten, so wird die Race Negretti, und zum Theil die Quadeloupe die Mehrzahl ausmachen müssen. Was Herr Neferent in seiner Bemerkung als Frage aufstellt, um diesen Satz einigermaßen zu beseitigen, nämlich: Ist es noch vortheilhaft Schafe solcher Art zu ziehen, als wovon das höchste Feinheits - Muster aus der gräflich - Salmischen c. wird abermals beseitiget, wenn man fragt: Ist der emlige, und aller Schafzüchter wärmsten Dank verdienende Hr. Verwalter Rudolph André im Stande, zu hoffen, den ganzen Hof zu der hohen Feinheit hinauf zu stimmen? Stützt sich diese Hoffnung auf die Existenz so hoch feiner Eltern oder Vorfahren? Oder hofft er diese Anomalie in der Heerde constant machen zu können? Ich frage: hat das vorige Jahr einjährige Mütterchen auch heuer mit 2 Jahren Wolle z<sup>o</sup>ss. Hat es bei der dort üblichen, sorgfältigsten Wartung keine Wolle gesponnen? In die sem bisher Gefagten ist wohl die Antwort auf den 3ten Satz, daß nämlich die viel kostspieligere Wartung, und das verminderte Gewicht der Wolle die allzugroße Ausbreitung der Escurials immer unmöglich machen werde. Die Wahrheit des 4ten Satzes, in soweit selber die Schädlichkeit der schütterten Wolle betrifft, ist längst gefühlt worden: in so fern aber mit der Feinheit der Wolle eine Schwäche, oder Kränklichkeit verbunden seyn soll, will ich meine 28jährige Erfahrung anführen. Mir geschah es, daß in der zu veredelnden Heerde, als ich auf diese eine zwar bessere, doch ländliche Wartung verwendete, die Sterblichkeit jene am zahlreichsten traf, welche eine Veredelung per saltum wahrnehmen ließen. Ich frage alle jene Schafzüchter, die mit sehr edlen Böcken veredelten, ob sie nicht oft, wenn in die junge Nachzucht die Sterblichkeit einriß oft zu klagen Ursache hatten, daß die schönsten, sage die feinwolligsten zu Grunde giengen. Ob die Schwäche mit der Feinwolligkeit eintreffe, oder bei der Veredlung die schon schwächere Mutter ein schwächeres, aber mehr des Bockes Eigenschaften erbedendes Lamm zur Welt bringt, will und kann ich nicht unterscheiden. Daß ächte Negretti mit sehr feinen Escurials - Müttern bessere, gleichere Wolle erzeugen mögen, als wenn Escorial - Widder mit Regretti Müttern gepaart werden, hab ich

wohl nicht erfahren, aber bei meiner Innzucht fiel meine Wahl immer auf Widder, die eine sehr feine, ausgeglichene, aber derbe, dichte, geschlossene Wolle trugen. Ich war durch Erfahrung gewitzigt, daß die scheinbare Feinheit mit dem lockern Vließ verbunden sey, und daß daraus leicht eine schlappe, hängende, sich spinnende und leichte Wolle entstehe. Hr. Rudolph André versicherte mich, daß ein Mann ersdorfer und Theresienfelder Widder, welche doch sogar Stichelhaare tragen, die Zucht wunderbar verbessern, und gestehet hiemit, daß diese Widder mit dem geschlossenen Vließ, mit den Paduaner gekreuzt, die beste, kaum gehoffte Verbesserung bewirken: dieses ist auch eine Antwort auf meinen 5ten Satz. - - ad 14tum. Staatsrath Thaler wünscht hier aus drücklich, daß man den Unterschied - Begriff bei den reinen originellen Merinos beibehalte, welches ich als das einzige Mittel ansehe, sowohl dem Fabrikanten, Wollhändler und Produzenten unsere terminologische Benennung faßlich und annehmbar zu machen, als auch selbst unsere Bemühung mit einigem Erfolg krönen zu können. Negretti und Escorial sie zu nennen, glaube ich, sollte zu weniger Irrthum Anlaß geben, als wenn wir schon der einzigen Feinheit wegen das Wort Electa brauchen würden, mit welchem Worte die Welt einen ausgebreiteten Begriff zu verbinden sich angewohnt hat. Was dann vollkommener Negretti oder vollkommener Escorial sey, welche, und wie zu benennende Eigenschaften zu jeder Race gehören, möge die gewiß erleichterte Aufgabe werden. Paddy den 30. März 1820. Des verehrten Vereins ergehenster Diener, Graf Emmersch Festicus, Mitglied und Repräsentant.

Festetics E. 1820. *Economic News and Discussions* 15(20):115–119

## 1. Remarks by Count Festetics.

The undersigned had the honor to submit to the highly respected Association his thoughts concerning the findings, the scientific denomination and finally also the enumeration of all the characteristics of a perfect wool, starting with the fineness and going on from there. The respected Association advised me initially to wait for the opinion of Staatsrath (title) Thaer. In # 12 and 13 of the 19th Edition of the *Economic News*, Staatsrath Thaer's remarks were published. If I hasten to give my individual statements concerning this important essay, as well as the remarks of Secretary and Rath [title] André, then it is, because it is my desire to advance this important branch of agronomical knowledge as much as possible.

1<sup>st</sup> That the Association will have to be aware of the choice of descriptive words the wool traders and firms use and which have become part of the working language, is certainly true. Even more so, since the Association should be in the foreground in giving names to certain characteristics. Very to the point, Staatsrath Thaer mentioned that a wool trader told him that the wool had the characteristics of "electoral wool", even though it was not "Electoral". But I also think that the Association should not be too easygoing. We have examples, where scientific societies, without prejudice and armed with knowledge, instructed the working man that the Association, incomparable in its knowledge of the science of wool, had the power to find the characteristics and to name them, to compile an aggregate of their lesser or greater perfection and to provide justification thereof. This way the wool trader will be informed, our manufacturers can give expression to their work now, where previously they could only guess without having a firm idea. The producers will be able to recognize the characteristics of the wool, singularly or in aggregate, and the Association will have the satisfaction to have been able to give order and clarity to the ideas of the wool traders.

Also, to have scientifically aided the manufacturers, and to have given the sheep growers a clear set of rules. The far sighted and logically clear language of Staatsrath Thaer, and his benevolent interest in our endeavors, have greatly benefitted this undertaking.

I will have to remark that here, I am not talking about the possible circumstances of the producer, even though it may be true, not every wool can be used for every product and that the producer may be in a situation where he would be dependent on the manufacturer. The point here is, to determine which characteristics the perfect wool should have. Do these characteristics have gradations among themselves? How can one name each characteristic, each in itself according to their mathematical gradation, using a scientific terminology? Finally, three questions are the most important: Can one find these characteristics in their highest (as far as they occur singly in Nature) form in combination? Or are some of the characteristics - and which ones - where one will exclude the other?

The 2<sup>nd</sup> question is, if the characteristics in their highest level cannot be found together, should one then differentiate between wool characteristic and characteristic, similar to two different wools such as Escorial and Negretti, and conduct further examinations? Or should one determine that there is no wool perfection, therefore Escorial? In this case, the Association would be justified to determine which aggregate of characteristics would be the most pleasing. There would then follow the determination which wool type production would be the most favorable with regard to the farmer's pecuniary circumstances.

The 3rd, 4th, 5th, and 6th questions: I do not believe that the Staatsrath here thought to say that a well-made, super fine wool would not satisfy a fine-textile manufacturer. It seems to me that the 3rd question only means, that not the characteristics of the wool, but rather a selected part of a combination of fine wools would, for instance, be the most useful for combed wool, named Electoral. The 4th question means hardly anything other than that the finest wool, because of the lack of necessary characteristics, could be qualified third class, even if the thickness of the wool string would place it among the finest.

In Hungary, we have the long experience that the wools - especially those that show smoothness - have the least dense fleece; that the open tips of the wool grow under perennial lack of fat as soon as the sheep is exposed to air and rain; and that in the end they lose their resilience to such an extent that they break and rip like they were half singed. I believe that the knowledgeable remarks of Mr. Andre are the object of further work which the Association will have to consider with regard to the naming of the rest of the characteristics. However, I will already now inform my most respected friend of my remarks in connection with question #6. G The creator of these observations clearly states that the wool tips of those animals who have darker, gradually changing to black, resin-like fleece, have lost all useful characteristics because of that hard crust. I will admit that. These wool tips lose some of their perfection, but not because of the collection of fat there, rather because they dry out and the wool turns brittle. But the benefit to the rest of the wool is great, because it aids in making the fleece denser, so that the fat is collected in the rest of the wool, and it also hinders the penetration of dust and sunlight. I would almost say that for nomadic sheep (trans humane), such as ours, who most of the time have to find their own food, this characteristic is essential and sine qua non. In Spain on the estancias, in smaller herds, they are kept close to the house and, just as with us, in excellent dairy farms They have a less dense fleece, and without that crust, so they can remain under the influence of the sun's heat. But I saw quite often that the well-fed stabled sheep 's wool presented 3-part clean wool near the body, 2 parts dirty, and the outer ends were dust-less but without traces of fat. I am familiar with one herd, which is also known to the Association, that has true Electra wool. It remains constantly outside in rain, wind and hot sun, and therefore the tips of the wool are without resilience and feels singed to the fingers. \*

\*Was this not the knowledge which moved those masters, the exemplary sheep breeders, to erect shelters on the grazing meadows where the chosen found shade or a dry place during rain. Others gave their sheep clothing to protect them and fed them in their barns.

This remark will later prompt me to suspect something. Everything else comes from my deep conviction, but it deviates from the thesis, ad 7th. I completely agree: ad 8th. Even though I do not want to interpret Staatsrath Thaer's conclusion, it seems to me that my friend Andre went too far. If the conclusion of the example #1 and #2 is complete Electoral, then, aside from the fineness, the other observed characteristics contributed to the classification.

Furthermore, I think that the Staatsrath did also not want to have two levels higher, only two levels of the following wools would be the measuring standard for the fineness gradations. But the specially cited words of the English wool trader were an indication that in each characteristic of the wool there is a select one, an Electra. That even in Electoral wool a Electra would have to be sorted out. And he further said, that here, aside from the high grade of fineness, also other characteristics play a role, without which the highest fine flakes would be thrown into the Terzera. Since the Official Rudolph Andre's micro-meter measurements put all Saxonian wool samples in the class 5r55, the example #1 .zszs, and #2 . gr\*55, then it would appear as if all Saxonian wool would be excluded from the Electra



qualification. This, de facto, would mean that we would have lost our process with all the wool traders and manufacturers.

No comment to # 9. To #10, the Staatsrath expresses himself logically and clearly. I am drawing the following conclusion: true Merino or Spanish sheep can show a dense fleece, yet highly fine wool, full of strength and therefore feeling somewhat rough to the hand. Here the hair is so dense and curled, that it appears short, even though when stretched it has the necessary length. The Staatsrath named this particular wool characteristic Negretti, even though this idea is somewhat abstract. But also, true Merino or Spanish sheep could have equally fine wool without showing a dense fleece which appears longer and has a particular soft feel - this would be to a high degree I agree with Mr. Andre's comments, only as concerns the third, I would have preferred that one would not have limited the characteristics to fat and finess disposition. This would be the time to underline that the Association has many reasons to adopt the stance that these two extremes should have their own name; that each race should be considered different because of their own particular characteristics. This differentiation would be the desired progress in the higher science of sheep raising. With this, the sheep breeder could set himself a goal according to his individual position, and he could reach it in a secure way. If the Association creates a new classification from the mixture (cross breeding?) of these two classes and those new characteristics, and how that should be treated, stands for future discussion, when the characteristics of the wool from this new herd show constantly and dominant.

To #11: the entire paragraph is important and it has been discussed often and always with the same result. I heard in another location, concerning the terminology of wool characteristics, the question whether the word Glecta means a separate wool fineness qualification.

To #12: The beginning of this paragraph is full of the most important sentences. I will make the following excerpt: first, that the highly fine Escorial wool is used for the manufacture of fine textiles. The Negretti wool in contrast is used for sturdier cloth. Secondly: to the Staatsrath's experience that the Escorial wool bearing sheep are of a highly delicate breed. Third: that the establishment and maintenance of such a herd brings many difficulties, and that this in itself would hinder the enlargement of the herd. To fourth: that the desired length of the wool has limitations, first because the wool does not remain upright, but would be laying down. Also, because these animals are often weak and sickly and they have to be tended with great care and receive grain rations. Fifth: there are factions where it is said that this affliction can be cured by mixing blood [cross breeding] together with Mr. Andre, I want to exclaim: So many points of importance! Sparks and flames erupt when one accompanies these paragraphs with observations.

The first sentence is mine, from an essay about inbreeding and has been discussed. Since Staatsrath Thaer now repeats it, I would like to remind the Breeder Association that I hope to finish the work of wool classification earlier, if we consider two, or even three races such as Negretti, maybe Quadeloupe and Escorial; because in all of them equally fine (say - superfine) wool with completely different characteristics could be the result.

I have a suspicion concerning the second sentence, which seems to be enforced by local experience. The so-called Gseurial or Saxonian wool is exactly like that in Spain, where the diligent Spaniards keep the sheep on, by law designated, grazing terrain. Chosen animals of the Merino trans humates breed were kept and mast fed in the stalls, similar to the Moravian half feed. The choice of the rams depended on obviously fine wool fleece and the shine of the wool. In our region, as well, we concentrated on these characteristics in the choice of the rams. In the 3rd and 4th generation we had

noticed that we garnered less than the accustomed weight in wool. And with negligent treatment, there occurred naked bellies, and among underfed sheep a rejection of the entire fleece was the most grievous result. But if the gentlemen would stick to the strict truth with the recommendations of refreshing the blood, then the Association should investigate, whether they would either want to sell their rams, or whether they, because of the above circumstances, had to rely on the blood refreshment themselves and then recommended it to everybody else. This Escorial wool, if it still retains resilience and strength, will become necessary for newly discovered products. Therefore, a constant and extremely careful tending to each animal is highly recommended. But, since the Austrian State cannot afford such tender care for millions of sheep, the breed Negretti, and partially also Quadeloupe will make up the majority's the sheep population. Now to Mr. Neverent's question, whether it was still advantageous to breed this kind of sheep, since the most fine of wool examples from the herd of Count Salmi had been eliminated. Here one has to ask oneself, is the diligent overseer, Mr. Rudolph Andre, who deserves warmest thanks from all sheep breeders, able to elevate the entire establishment to this high standard of fineness? Is this hope based on the high noble parents and ancestors? Or does he hope to make this anomaly among the herd a permanent? I ask: will last year's yearling little mother give the same wool in her second year? Did they not spin any wool despite their usual careful tending? In all this lies probably the answer to \$3: that a very extensive acceptance of the Merino will always be impossible, because of its expensive maintenance, and the reduced weight of its wool.

The truth of #4, as far as the damage of the skimpy wool is concerned, has been felt for a long time. In connection with the statement that the fineness of the wool is dependent upon a weakness or disease, I would like to cite my 28 years of experience. I saw that in the improved herd, which I tended in a better, but rural manner, the mortality was highest among those, that had been improved per saltum. I am asking all sheep breeders, who used the most noble rams to improve their herd, whether they did not bemoan the mortality of the young offspring, that the most beautiful, that is to say, the finest wool bearers had died. I cannot and will not differentiate whether the fineness of the wool prompted the weakness, or the improvement of the already weak mother sheep caused the birth of a weak lamb that had inherited the characteristics of the ram. I did not find that a true Negretti with very fine Escorial mothers would result in better, uniform wool than when a Escorial ram is put together with a Negretti mother. But in my inbreeding, I always choose rams which had very fine, relaxed but strong and dense wool fleece. I learned from my experience, that the apparent fineness was tied to a loose fleece, and from that sprang a floppy, hanging, spinning and light wool. Rudolph Andre assured me, that a Mannersdorfer or Theresienfelder ram, who even has prickly hair, would improve the herd greatly, and he therewith admitted that this ram with the dense fleece, crossed with a Paduaner sheep, would bring the best, almost too much to hope for, improvement.

This is also an answer to #5 - ad 14tum. Staatsrath Thaer expressly wanted that here that we keep the differentiation between the true original Merinos. This I see as the only way to clarify our terminological attempts to the manufacturers, wool traders and producers. And also make it the crowning of our work. To call them Negretti and Escorial, I think, causes less confusion than if we were to use the word Electoral just because of the one characteristic.

Whatever the perfect Negretti, or the perfect Escorial will be, and which still to be named characteristics belong to each, will be the next easier task.

Patty the 30th of March, 1820

The Association's most sincere Servant Count Emmerich Festetics, Member and Representative.

**Festetics E. 1820. *Oekonomische Neuigkeiten und Verhandlungen* 25(20):193–195**

**Bericht des Herrn Grafen Emmerich Festetics über die vom Schafzüchtler Verein angeregten Veruche der Hechselfütterung nach Petrischer Methode.**

Da der sehr harte und längere Winter schon sich endiget, fühle ich mich bewogen, der hochverehrten Gesellschaft auch meine über die Hechselfütterung gemachten Erfahrungen mitzutheilen. Unseres Mitglieds des Petri Werk, über Hechfel- und Körners fütterung veranlaßte die Gesellschaft dazu, den Wunsch zu äußern, daß mehrere Mitglieder die Probe machen, und ihre Erfahrungen mittheilen möchten, Ich gestehe zuerst Folgendes: Mit meinen Schafen getraute ich mich nicht die Probe anzustellen, theils wegen Mißtrauen, daß diese Art Fütterung nicht hinlang werden, theils um nicht mit dem Hechfel die Hals - Wolle zu verunreinigen. Ich beschränkte also meine Probe auf mein Hornvieh. Ich unterzog der selben 1mo. 20 Stück Zugochsen, wovon 4 Stück Al \*halber etwas fetter gemacht an Fleischnauer verkauft werden sollten. 2do. 20 Stück Kühe, inclusive 1 Stier. 3tio. 30 Stück Jungvieh von 2–3 und 4 Jahren. Mehrere Arten der vorgeschlagenen Fütterungs Methoden zu unternehmen fand ich nicht rathlich; ich entschloß mich also zur Wohlfeilsten mit einigen gelegentlich anzuführenden Abänderungen. Ad mum. Am 1. November sollte die Fütte "9 angefangen werden. Die 20 Stück Ochsen wurden im Gewicht auf 105 Centner geschätzt, worunter die für die Fleischbank bestimmten die geringsten, und das Paar auf 9 Centner geschätzt waren. Als Conser vations Futter wurden gerechnet 20 t6 trocknen Heckfel. 5°sch auf alle 24o t5 Heckfel vom Kornstrod, hier i" Ägliche Salz in Wasser aufgelöst, und 22 5 Kornmehl sammt Kleien. Die eine Hälfte ward Abends, die andere Früh zugerichtet, und in kleinen Portionen dem Vieh vorgelegt, in dem Zustand, als die beginnende Gährung den angenehmen süßen Geruch erzeugte. Da dies nur Conser vations - Futter seyn sollte, bei welchem die Zugochsen auch die im Winter üblichen \*arbeiten sollten verrichten können, die 4 Stück Mastochsen aber auch an Fleisch und Fett ansetzen sollten; i° ward es eingerichtet, daß diese zu dem Conserva °n\* "Futter pr. Paar noch 5 t5 Wicken-Heu zu Hech self geschnitten, und 3lb Kornmehl, in die schon fer ge Futtermassa erst bei dem Verfüttern gemischt täg °b erhalten sollten. Abends ward ihnen Stroh, wel °h" schon von den Schafen durchgefressen war, mit Eichenlaub eingestreut. Die Mastochsen sind 16. Februar verkauft, und das Paar auf 1o/. Centner Fleisch, 1 % Centner In schaft geschafft worden. Also binnen 1o8 Tagen von dem bei Ruhe genossenen Mastungsfutter pr. 54o t5 Wickenheu, und 328 tb Mehl, war Zuwachs 3 Centner. Die Zugechsen waren in immerwährendem Ge Äuch, sie machten wöchentlich zwei bis dreimal mit \*führung von Früchten, auch Klafienholz auf 1% Meilen. Bekamen außer dem Conser vations - Futter nicht einmal Wirrfroh, nur wenn sie auf die Ferne fuhren, etwa 4 i5 Wickenheu pr. Stück zum Futter während dem Ab- und Aufladen. Heute am 10. März hatte ich Gelegenheit die nämlichen Männer, die im Herbst schätzten, zur Erneuerung der Schätzung aufzufordern. Man fand sie ganz in einem Zustand, daß man sie dem Früheren gleich schätzte. Ad -dum. Da die Kühe theils noch melkbar" manche hochträchtig waren, so ließ ich zu dem wie oben verfertigten Futter auf den Kopf täglich 35 Klee, und circa 5 U5 Erdäpfel (rohe) mischen. Abends bekamen sie ihre Raufen mit Weizenstroh gefüllt. Sie sind in ermünchtestem Zustand verblieben; doch kann ich nicht behaupten, daß sie zugenommen hätten. Ad 3tium. Zur Erhaltung der 30 Stück Jung" vieh bestimmte ich folgende Fütterung auf 1 Tag: 30o W5 trocknen Heckfel (meistens Weizenstroh), 6o H5 Kornmehl, 1H5 Salz in das Wasser. Das Vieh ist über Nacht mitete was Futterstroh (halb Gersten, halb Haberstroh) beiläu fig 2 H5 pr. Stück versehen worden. Ich habe Urfa che zu vermuthen, daß dies Futter mehr als

Confer vation bewirkte, in dem felbes dabei an Größe und Umfang zugenommen hat. Es sey mir erlaubt hier folgende Betrachtungen beizufügen: In meiner Gegend hatte man von jeher dem Mangel an Heu dadurch abzuhelpen getrachtet, daß man Hechfel mit Gersten, oder Kukurutz, oder Kornmehl gemischt dem Vieh gab, und ihm Ruhe gönnte. Wenn ich aber die Qualität des Mehls betrachte, welche man verwendete, so ist der Kunst, das Hornvieh zu überwinden, dadurch ein Dienst erwiesen worden, daß man durch die Anleitung des Hrn. Wirthschafts Rath Petri, auf die Wirkung der beginnenden Gährung, ist auf merklich gemacht worden. Es ist bei der großen Kälte, die diesen Winter herrschte, in dem luftigen Stalle die Gährung binnen 3, 4 Stunden nicht immer entstanden; die Massa lag deswegen 8 bis 10 Stunden in dem Bottiche, ohne an Säure zu gränzen. Nur wenigmal war es soweit gekommen, daß sie einen sauren Geschmack bekam, wo sie dann von den Ochsen verschmäht, von den Kühen, in der oben erwähnten Mischung, desto gieriger genossen worden. Es ist nicht zu übersehen, daß das Vieh dieses ungewohnte Futter die ersten paar Tage zu verschmähen scheint; aber, wenn man in sehr kleinen Quantitäten dieses Futter fürleget, es bald darauf gewöhnt wird, und dann selbes dem sonst gewöhnlichen Futter vorziehen pflegt. Ich brach, wie es sichtlich ist, etwas von dem vorgeschriebenen Salz ab, ließ es aber an den Sonntagen dem Vieh aus der Hand eingeben, und damit den Gaum und Zunge abreiben. Es schien mir, die Mägen meiner Thiere wären an diesen wiederkehren den stärkeren Reiz gewöhnt gewesen. Der Koth, den die Thiere fallen ließen, war etwas härter als bei meiner sonstigen Fütterungsmethode, und die braundunkle Farbe, von welcher wir (vielleicht auch aus Vorurtheil) dessen Dungkraft zu beurtheilen gewöhnt waren, mangelte ganz so zwar, daß meine, die Probe millig durchführende Knechte, die Ersparniß an Rohfutter, und folglich die Nützlichkeit von dieser Seite anerkennend, mir doch pro phezeihen zu können glauben, daß ich von dieser Fütterungsmethode wegen der bald am Rückschlag der Ce realien zu bemerkenden Kraftlosigkeit des Düngers ab stehen werde. - Obwohl ich diese letzte Beforgniß bei Anblick des Mistes selbst theilte, so bin ich doch für die Mittheilung der Petrischen Erfahrung aus der Ueberzeugung dankbar, daß der Landwirth vielmehr Vieh Üvelches jedem ungarischen Wirth wohlthun wird) werde auswintern können. Doch wünsche ich auch herzlich, daß kein Landwirth irre geleitet werde, vielleicht einen eingeleiteten Kleebau, wegen seinem mehrseitigen Nutzen, eingehen zu lassen. Wenn was zu ändern wäre, so riethe ich die Weglassung des großen Wicken Anbaues, dafür aber die Erzeugung der Früherbsen.

Festetics E. 1820. *Economic News and Discussions* 25(20):193–195

Count Emmerich Festetics' Report on the Experiments suggested by the Sheep growers Society, concerning the Feeding of Chaff according to the Petri Method.

Since the long, cold winter is about to end, I feel moved to communicate my opinion and knowledge to the highly respected Society concerning the feeding of chaff. The work of our fellow member, Petri, on the feeding of chaff and grains, led to the Society's desire that several of its members do trial feedings and then report their results. First off, I have to confess the following: I did not dare to do these trials with my own sheep, partially out of the feeling that this type of feeding would not be sufficient, and partly also, because I did not want their neck wool dirtied. I therefore limited my trials to my cattle. I did this for one month, using 20 cart oxen, of which 4 were destined, after fattening, for sale to a butcher. Also 20 cows, including a steer, plus 30 young animals of 2/3 and 4 years old. Several of the feeding methods did not seem useful to me. I finally decided to use the least expensive method, together with some indicated changes.

On November 1st, feeding #9 began. The 20 oxen were estimated to weigh about 105 zentner (1 zentner - 100lbs). Among them were those, that were destined for slaughter and they weighed the least - one pair's weight was estimated as 9 zentner. As maintenance feeding, the amount came to 20 t6(?) dry chaff, 5\*sch(?) for all 240 t5(?) of chaff of grain straw, to that 1" in water dissolved salt and 22 5 cornmeal with bran. Half of this was prepared in the evening, the other half in the morning, and it was given to the animals in small portions and at that moment, when the beginning fermentation produced a pleasantly sweet smell. Since this was purely maintenance feeding, and since the cart oxen had to perform the usual work during the winter, and the four to be slaughtered oxen had to gain weight and fat, I decided that, in addition to the maintenance feeding, for each pair of oxen 5 t5 vetch chaff and 3 lbs of cornmeal per day would be added to the prepared fodder at feeding time.

In the evening, straw that had already been pre-grazed by sheep, and oak leaves were spread out. The, to be slaughtered oxen were sold on February 16, the pair was estimated to bring 10 zentner of meat and 1% zentner). Also, during the 108 days of rest, the mast fodder of 540 t5 of vetch hay and 328 tb meal resulted in a 3 zentner weight gain. The cart oxen were in constant use, they did two to three trips a week transporting fruit and wood. They were fed only maintenance fodder, not even straw. Only when they went on long hauls were, they given additional 4 in vetch hay each during the loading and unloading time.

Today, on the 10th of March, I had the opportunity to challenge the same men who gave me an estimate in the Fall, to give me another estimate. They found the cattle in the same shape as before. Since the cows in part were still giving milk, and others were highly pregnant, I decided to add daily 35 clover and 5 U5 raw potatoes per head of cattle to their ration. Wheat straw was filled into their cribs at night. They remained in good shape, but I cannot say that they gained weight.

For the thirty young animals, I ordered the following daily ration: 300 W5 dry chaff (mostly wheat) 60 H5 cornmeal, and 1 H5 in water dissolved salt. At night the animals were given feed straw (half rye and half oat) - 2 H5 per head. I have reason to think, that this fodder was more for maintenance, while they increased in height and weight. I allow myself to add the following observation: in my region, we always tried to augment the shortage of hay by adding barley or Kukurutz (cracked corn) or cornmeal. And we gave them rest. But when I look at the quality of the used meal, I would have to

give credit to the advice of Wirtschaftsrat [title] Petri, to closely observe the timing of the initial fermentation. During the intense cold in the open stables, the fermentation did not always occur during the indicated 3 to 4 hours. At times the mix stayed 8 to 10 hours in the containers without showing signs of fermentation. And once it happened, then it produced a sour taste, which the oxen refused, but which was greedily consumed by the cows. One has to observe that the cattle refused the unaccustomed fodder only the first few days. However, once it was introduced in small quantities per day to their normal rations, they got used to it and finally seemed to prefer it to their normal fodder. I deviated somewhat from the prescribed amount of salt, but on Sundays I ordered it to be given by hand and rubbed on their gums and tongues. It seemed to me that their stomachs craved the stronger stimulant.

The excrement, dropped by the animals, was somewhat harder than with the accustomed fodder, and the dark brown color, from which we (maybe a prejudice) judged their power as fertilizer, was completely missing. To such an extent, that the field hands predicted that the lack of fibrous fodder, which they considered useful, would finally result in a less abundant grain harvest because of the weak fertilizer.

Even though I share their beliefs when looking at the droppings, I have to be grateful for the Petri observations, which made it possible for me to bring more cattle through the winter months. I also heartily wish, that no farmer will be wrongly tempted to let an established clover field die, since clover is so useful. If there is something that should be changed, then I would suggest to decrease the over cultivation of vetch, and to turn to the cultivation of early peas.

Festetics, E. 1822. *Oekonomische Neuigkeiten und Verhandlungen* 92:729–731.

373. Ueber einen Auffatz des Hrn. J. R. im 3ten Hefte des Jahrganges 1821

Das Praktifche in fo manchen Zweigen der Land wirthfchaft nebft andern Gefchäften füllt meine Zeit zu fehr aus, als daß ich es (felbft wenn die Gelehrfamkeit in jedem Fache der Hülfsweifenshaften mich unterftützen würde) unternehmen könnte, über jene drei Schrif ten mein Urtheil kund zu thun. Meine Reifen nach Brünn zum Schafzüchtlervereine beweifen genügfam, daß ich, obwohl in den Debatten manchmal felbft auf tretendes Mitglied, immer nur nach Belehrung ftrebte, die Läuterung meiner Ideen fuchte, die Zurechtweifung felbft hochachtete. - Da ich aber Seite 151 erfte Spalte mich genannt, meine Anfichten – Scheingründe betitelt, meine Beobachtungen alle auf die ungarifche Hühnerzucht eingefchränkt vorgetragen fehe, wahrnehme, daß daraus und dem ganzen Auffatz irre führende, jedem Schafzüchtler fchaden könnende Folgerungen fließen müffen, fo muß ich in der oft befprochenen Sache der Innzucht wohl noch einmal die Feder ergreifen. Vor der Hand einige Worte an den Hrn. Verfaller J. A.: – Sie, mein Herr, fcheinen, fo man chem großen und fehr befchäftigten Herrn ähnlich, meine anno 1818 gefchriebenen, über die Innzucht handelnden Auffätze von Unten aufwärts gelesen zu haben. Sie fa hen – ein Graf vertheidigte die Innzucht, lafen hinauf zu den argumentis, fanden zu meinem Un Oekon. Neuigk. Nr. 92, 1822.

glück, was ich zuletzt nur berührte, des neuangefiedelten Haufes Henne und ihre Brut; mögen, ohne weiter zu lefen, die Schrift von fich gelegt haben, und fcheinen laut ihrem Auffatz der Meinung geworden zu feyn, daß es in Ungarn Menschen gäbe, die durch künstliche Paarungen das Federwerk der Haushühner in das Gefieder der Kolibri umzuwandeln ftreben. – Nein! mein Herr! die Ungarn wiffen es fehr gut, daß bei ihren Thieren, welche der treibhausartigen Wartung noch fehr entbehren müffen, die naturgemäßen Paarungen nothwendig find, daß die davon Abweichenden, wie billig, von der fonft fo freigebigen Natur ftreng bestraft werden. Nun an das Schafzüchtler-Gremium ! Meine Auffätze folgten nothwendig den gepflogenen Debatten. Freih. v. Ehrenfels rath in feinem werthvollen Auffatze zur Kreuzung. Freih. v. Bartenstein, als Präfes des Vereins, der jeden wichtigeren Satz beleuchtet wiffen wollte, brachte in dem Referate diesen Gegenstand zur Frage: Ob nämlich bei einem Race - Vieh die Innzucht oder die angerathene Kreuzung vorzuziehen fey. Ich begreife folgende Wörter auf beigefetzte Weife: Race-Vieh nenne ich eine jede Gattung, welche ihre Haupt-, also von dem Befitzer vorzüglich gefuchte Eigenfchaften also befitzet, daß fie felbe erhalten und bei intelligenter Aufficht fortvererben werde: als constant ift.

zeichnenden Eigenfchaften mitfammen paaren, damit ihre gegenseitigen Vollkommenheiten die gegenseitigen Mängel ausrotten: gleichviel ob fie beide in ihrer Art Race - Thiere find, oder nicht; doch in der Homogenität nothwendig divergiren. Wenn ich, wenn man zu den vielen Vollkommenheiten des Stammes eine eminente Qualität eines homogenen Thieres beigefellen will. Mit diesen Begriffen vertheidigte ich dort mündlich, daß derjenige, der das Glück hat, eine noch fo kleine Heerde Race - Vieh zu befitzen, welche die er wünfchten Eigenfchaften befitzt, und folglich felbe auch zu vererben im Stande ift, ja nicht kreuzen, fondern die Innzucht (allgemeine) treiben foll. Herr Hofrath André, als Sekretär, benutzte diesen Moment und ftellte in den preiswürdigen Oek. Neuigk. die Frage über Innzucht zum Gegenstand der Debatte hin. Nur fetzte er noch die Worte – in der nächften Blutsverwandtschaft – unbe dingt, und lange fortgefetzt – hinzu. In meinen Auffätzen fprach ich nie davon, daß es bedingt nothwendig fey, in der nächften Blutverwandtschaft zu paaren, wohl aber, daß – wenn der zum Stammhalter erwählte Widder meinem Ideal entfpricht, felber ohne Rückficht auf die Verwandtschaft benutzt werde. Bei den 9 Stück Müttern, mit welchen ich anfangs meinen Stamm zu bilden, war freilich nur ein Widder, seine Lämmer waren also väterlicher Seits wohl

Geschwister, aber mütterlicher Seits waren sie entfernter – durch 16 Jahre blieb bei den sich vermehrenden Müttern freilich nur immer ein Stamm widder: folglich in ewiger Blutverwandtschaft. Doch war das Wort unbedingt nicht meine Regel. Viel mehr war es immer sehr bedingt, daß der Widder, der zur Ehre des Stammhalters gelangen sollte, an Güte des Vließes, an organischer Vollkommenheit die übrigen übertreffe. Wenn man mir zumuthen will, daß ich unter organischer Stärke vielleicht einen gut gemästeten Fetthammel verstehe, so kann ich nur sagen, daß ich nie Hafer oder Erbsenfütterer, daß mein Vieh weit entfernt von der treibhausmäßigen Wartung aufwuchs. Wie lange diese Innzucht, bei welcher eine Blutverwandtschaft nicht zu vermeiden ist, festgesetzt werden müsse, habe ich nie ausgesprochen. Nun sage ich es das erstemal, daß wenn man durch diese geregelte Innzucht so weit gekommen ist, daß man zu feinen Race-Müttern mehrere Widder verwenden muß, so kann und soll man die Heerde in Familien eintheilen, und jeder einen Widder zutheilen. Hat man nun Familien, so erlaube man sich doch nicht einen Widder zu wählen, der sich von den Eigenschaften des Originals oder des Ideals zu entfernen scheint. Alle aufmerksame Schafzüchter sind durch Erfahrung belehrt und läugnen es nicht, daß keine Race auf der Welt existire, in welcher Varietäten, Gebilde der immer wirkenden Natur selbst durch die strengste Innzucht verhindert werden könnten. Diese beziehen sich nun entweder auf einzelne Theile des Körpers, oder auf die Eigenschaften der Wolle. In letzterer Hinsicht entweder in mehr oder minder gefällige Eigenschaften der Wolle. Nehme man nun zu einer Familie einen Widder, der von dem Ideal eine geringe, wenn auch gefällige Abweichung zeigt, und setze die Paarung mit solchen Erscheinungen fort, so wird mit jeder Generation diese Abweichung mehr und mehr erschein. - Hiervon hat Herr Staatsrath Thaer die klare Ueberzeugung sehr schnell bekommen. Dr. und Prof. Ryß führt diese Stelle 68 an, doch erklärt er diese wichtigen Worte in einem andern Sinne, als ich. Sie sind: Und so bekommt das Vließ, wenn man bei der Paarung einzig und allein (ein klar ausgesprochener Fall) auf höchste Feinheit und Sanftheit sieht, und einen sich darin ausgezeichneten Stamm immer mit sich selbst verbindet, leicht Mängel an Dichtigkeit und Geschlossenheit c. Weiter folgt – Allein, wenn man immer nur die höchste Feinheit mit Beiseitesetzung aller andern Rücksichten verfolgt c. – Nach dem ich in allen meinen Aufsätzen jenen Satz bestritten habe, daß in der allerfeinsten Wolle nothwendig alle übrigen empfehlenden Eigenschaften gegenwärtig seyn müssen; vorzüglich wenn von der, natürlich geregelten Paarung die Rede war, so darf ich nochmals mit lauter Stimme sagen, daß des Widders Wolle vor jenen der Mütter eine Art Männlichkeit vorhaben müsse, wie ich auch die Gelegenheit benutzte, bey der Beschau in Brünn meine nächste Umgebung aufmerksam zu machen, in wie weit die Zwillingenjährlinge, die doch von einem Vater und Mutter in einem Momente empfangen wurden, obwohl beide feiner als die Mutter, doch an dem Charakter der Wolle ihr Geschlecht auszeichneten, welches ich bei den oftmaligen Zwillingen meiner Stammheerde zu beobachten wiederholte Gelegenheit habe. Herr Rudolph André hat mich, wie es mir schien, ganz begriffen. Ich vertheidigte auch den Satz, daß die bestimmt Negretti zu heißenden Race-Thiere mit ächten Race Thieren aus der Escorial - Race gepaart, nur Baltharde erzeugen werden; daß es schwerer wird in der Nachkommenschaft den gemischten Charakter constant zu machen, als sie zu diesem oder jenem Original-Charakter zurückzuführen, und sage es noch. Ich getraue mich dormalen noch zu behaupten, daß bei unserer Wartung, bei der Wahl der Widder, bei der mit minderer Bewegung verbundenen Fütterung die Neigung vorherrschend wird, daß aus den gedrängt wolligen Stamm, Varietäten mit gedehnter Wolle entstehen; daß es also dem Schafzüchter mehr Mühe, ja ich kann sagen, manche Ueberwindung koste, Thiere mit gedrängtem Vließ zu erhalten, besonders nachdem man sich dormalen angewöhnt, die derbere, männliche Wolle des Widders, für gröber zu halten. Spricht nicht für diesen Satz alles, was man je gelesen hat, über die Musterung der Lämmer, welche die Majorals in ihrem Lavagnen zu beobachten pflegen? um nämlich den ihrer Lavagne eigenen Charakter zu erhalten. Was Herr Dr. Ryß Seite 66 von dem Gestütswesen sagt, mag wohl etwas grell aufgetragen seyn. Hierüber verweise ich selbst auf einen Aufsatz in den Oekon. Neuigkeiten, welcher das



Wettrennen in Koptfan beschreibt, und gelegentlich etwas wenig, doch gründliches über die Auswahl der Hengste vorträgt. Aufnämlicher Seite ist von der ungarischen Pusten wirthschaft die Rede; dieß muß ich zur Hälfte bejahen, zur Hälfte aber dahin erklären, daß wohl fremde Bullen in viele Heerden erkaufte werden, weil der Stamm entweder nie vollkommen war, oder wegen andern Ursachen herunter kann. Doch glaubt kein vernünftiger Wirth, daß ohne vermehrte Aufsicht und Pflege, der Bulle allein alles gut machen werde. Aber woher nimmt die Deregegyházer, die Pahier, die Lutinovitofche Gula ihre Bullen, von welchen doch jeder schöne Bulle gekauft wird? – Sie ziehen sie selbst, und die Race Tulipan in Deregegyháza ist, bei ihrer Innzucht, noch nicht übertroffen worden, so wie in der Schweiz die Race im Kloster Einsiedel. Wenn Backwell, Masson, Sebright in ihren Versuchen außer den Grenzen der Natur gingen, oder sie, die mächtige, in die ihr nicht passenden Model zwingen wollten, verdienen sie nichts weniger unsern Dank, denn wir erfuhren, daß die Natur bei wider - oder über natürlichen Vorgängen strafend sich benehme. Also meine Ueberzeugung ist fest, und ich sage mit dem Stifter der Landwirthschafts-Wissenschaft, dem ehrwürdigen Staatsrath Thaer, daß die Begattung in nächster Blutverwandtschaft im Allgemeinen nicht nachtheilig sey, vielmehr allemal bewirkt werden müsse, wenn man die bei Individuen sich ausgebildeten preiswürdigen und erwünschten Qualitäten fort pflanzen und in dem Stamm constant machen will; daß eben dieß der Fall sey, wenn man eine Pepiniere von Race - Thieren zu besitzen das Glück hat. Und ich will mit den Worten des Dr. Ryß schließen, indem er sagt: Wie, wenn der Unkluge, wenig Berechnende – Träge, Unaufgeklärte, leichtsinnig Lesende, jeder Reiche u. s. w. durch blindes Nachmachen unter allen Umständen und Verhältnissen schon im Besitze der Gewißheit des Erfolges wäre, da würde wohl nur überall das blinde Glück herrschen, und das Nachdenken die rege Aufmerksamkeit, die kluge Ausdauer, die göttliche Gabe, die Intelligenz fände nirgends eine wahre Belohnung, oder auch nur ein Vergnügen. Güns, im Monat Januar 1822. Graf Emerich Festetics.

**Festetics E. 1822. *Economic News and Discussions* 92:729–731**

373. About an essay by Mr. J.R. in the third publication of the year 1821.

Apart from other business activities, the practical aspects in some of the agricultural branches take so much of my time that (even if scientific knowledge could come to my help in all areas) I could not possibly proceed to give my judgment on all three papers. My trips to sheep breeders' societies in Brünn demonstrate clearly enough that, although I myself occasionally participate in the debates, I have actually always looked for improvement myself, for a refining of my ideas; I even always have highly valued being corrected. However, I see that I have been mentioned on page 151, 1st column, and that my opinions which are referred to as bogus reasoning, are exclusively based on observations I made while studying Hungarian poultry farming. I accordingly greatly fear that this can, as does the whole paper- lead to very misleading conclusions leading to potentially very damageable consequences for every sheep breeder, so that I see that I must once again take up my pen to comment the often-discussed issue of inbreeding. First a few words to the author of the paper, Mr. J.A.: You Sir, appear, much in the manner an all-important and very busy gentleman, to have read my papers about sheep inbreeding from the year 1818 from the bottom up.

You saw a count speaking in favor of inbreeding, read upwards to the argumentation, found to my luck [Oekon. Neuigk. = *Economic News No.92, 1822.*] what I, at the end, barely touched upon, namely the newly occupied house Henne and her brood. You then may have put the text away without reading any further, and seem, according to your paper, to have been of the opinion that there would be in Hungary breeders who through artificial mating attempt to transform the ordinary hens' feathers into the plumage of humming birds. – No Sir! The Hungarians know very well that their animals, which must still very much do without the care provided in special breeding compounds, must imperatively follow nature's breeding rules unless that very nature, otherwise so generous, severely punishes deviant behavior. And now about the Sheep Breeding Committee! My essays did, of necessity, follow the ongoing debates. Baron von Ehrenfels in his valuable paper is in favor of interbreeding. Baron von Bartenstein, the committee president, who wanted every single important sentence explained in detail, introduced into this discussion the following object: whether for a given livestock inbreeding is preferable to the traditionally recommended breeding kind. I understand the following words as follows: I understand as *breeding livestock* any species that retains primarily the main characteristics sought by the breeder, those very characteristics that they themselves inherited and, through careful breeding, are likely to transmit further: as a constant must be the pairing of desirable and complementary characteristics so that their end qualities would eliminate their combined undesirable traits: no matter whether they can both be characterized as *breeding livestock* or not. However, I call grafting what takes place when a homogeneous animal's specific trait is added to the many perfected qualities of the stock. So, I am actually arguing that someone still lucky enough to be in possession of however small a herd of *breeding livestock* that is still able to transmit as well as keep inheriting itself such desirable characteristics should not interbreed but stick to (general) inbreeding instead. Councilman André, secretary, chose this moment to record in the inexpensive "Economic News" [=Oek. Neuigk. See above] the issue of inbreeding as the subject of the debate. But he also added the expressions - in the next blood relationship – necessarily, and long lasting. Never did I anywhere, in my essays, ever mention that mating must be restricted to within the next blood relationship; on the contrary if the designated breeding ram matches my ideals, he should be used without any concerns for blood relationships. For the nine mothers that I used to build my lineage there was actually a single

ram, so his lambs were truly all siblings on the father's side but they were more distantly related on their mothers' side. Throughout the sixteen years of multiplying mothers there never was more than a single breeding ram: therefore, forever an inbred situation. Yet that word was not necessarily my key rule. The main thing was for the ram to succeed, for the breeder's reputation, in surpassing the others in the quality of the fleece, in organic achievement. Should it be held against me that my understanding of organic strength is a well fattened sheep, I can only say that I feed my sheep neither oats nor peas, that my livestock always grows at a good distance from the *maintenance area* [food growing/preparation area]. I have never expressed an opinion as to how long this inbreeding, which makes avoiding blood relatedness impossible, should be carried on. I am now saying for the first time that when this regulated inbreeding has been practiced for so long that the breeding mothers must be presented with several rams, the time has come to distribute the herds into families and to affect a different ram to each. Should there now be families, this still does not justify choosing a ram that appears to have different characteristics from the original one or from the ideal. All observant sheep breeders have learned from experience - and would not deny - that there is no breeding livestock on earth, in which variations or new forms brought about by the always active natural world, could be prevented even through strict inbreeding. These [variations] are to be found either on single body areas or in the properties of the wool: In the end, in either larger or smaller properties of the wool. If we now take to one of the families a ram that diverges from the ideal by a tiny - if also pleasant - difference and have the mating take place, these marks will keep diverging more and more with every generation. Town counselor Thaer saw this clearly very quickly. Dr. and Prof. Ryß, but he interprets those important words differently from me: namely: that with regard to the mating, this is how the fleece, if one's attention is exclusively focused on the highest grade of fineness and softness (which is rather evident), and one sticks to a single top line of heredity, slight deficiencies in denseness and compactness follow. It follows further that if one keeps looking exclusively for consistently greater fineness while dismissing all other criteria- this after I have fought in all my papers against those words, that in the most refined wool all other recommended qualities must be equally included. Especially when discussing the, of course, controlled breeding I must insist again very loudly that the ram's wool, as compared with that of the mothers, needs to retain a certain virility. I likewise used the opportunity at the fair in Brünn to point out to my neighbors how much the year's twins, conceived from father and mother simultaneously, although having a finer wool than the mother, nevertheless carry characteristics in their wool that reveal the mother's sex, something that I often have had the opportunity to observe among my herds' frequent yearly twins. I believe Mr. Rudolph André has understood me well. I also stand behind my claim that if definite Negretti breeders are crossbred with true Escorial breeders they will only produce bastards; that it is harder to uphold the combined characteristics of both in the next generation than to have them go back to one or the other of their original traits, and I maintain that still. I also claim further that given our great care, the careful selection of the rams and feeding methods tied to a minimum expanse of movement, there will emerge a predominant tendency for looser [lighter] wool varieties to arise out of the original dense wool strains; this option of course means trouble for the sheep breeder; I might even go so far as to say that he may even need to overcome his own reluctance in order to go for animals with dense fleece, especially after one has become used to seeing the coarser, male type of the ram's wool as cruder. Does not everything that one has ever read about the physical examination of the lambs, [*that the Majorals in their Lavagnen are watching*], speak in favor of that statement? So as to obtain the very characteristics of their own *Lavagne*. What Dr. Ryß says on page 66 about character may be considered quite harsh. In this respect, I'd like to refer that person to an article in the Oekon. Neuigkeiten (*Economic News*), which describes the ongoing race in Koptsan but also reports only a few yet thorough facts about stallions' selection. On the same page is the Hungarian farmyard animals' management discussed; I do agree

with half of it; but as far as the other half I must explain that bulls are indeed bought and brought into many herds from the outside, either because the stock was never perfected or for whichever other reasons. But no sensible breeder believes that, without increased oversight and care, the bull alone would make the difference. But where do the Deregegyházer, the Patyier, the Lutinovitoifche Gulya get their bulls, they from whom every single beautiful breeder is bought? They raise them themselves and the Tulipan breed in Deregegyháza has, as the result of their inbreeding, never been surpassed, and the same is true of the breed from the Einsiedel monastery in Switzerland. When Bakewell, Buffon, Sebright performed experiments that went beyond the laws of nature or else attempted to force against it, the all-powerful one, a model that lies outside of nature's bounds, they are no less deserving of our thankfulness, because we learned then that when methods are used that go against nature or natural processes, nature will retaliate. Therefore my conviction holds – and along with the founder of the *Agricultural Scientific Society*, the honorable town counselor Thaer, I am saying that conceiving within the closest blood lines is generally not harmful and that, much to the contrary, it ought to be practiced if the intention is to keep reproducing the highly valuable and desired qualities previously achieved in individuals and to make them permanent in the stock; and this is still true for someone lucky enough to own a breeding stock nursery. I want to close in Dr. Ryß's words: namely how, if the stupid, shortsighted – lazy, ignorant, careless reader, any rich person etc. were already assured of success while working under all circumstances and conditions through blind imitation, there would reign everywhere the blind luck of fortune - whereas reflection, sustained attention, clever perseverance, God given gift, intelligence would never find true reward, not even satisfaction.

Güns [Kőszeg], January 1822. Count Emmerich Festetics

**André, CC. 1819. *Oekonomische Neuigkeiten und Verhandlungen* 4:26-27.**

## Debatten. Schafzucht.

Erklärung des Herrn Grafen Emmerich von Festetics. (Beschluß von Beil. Nr. 3.)

## Anmerkungen des Herausgebers.

Ich rechne es mir zur größten Ehre und zum süßesten Lohn an, (der mich auf einmal für eine Menge schiefer Urtheile der Halbwisser, wovon mich die wenigsten nur einmal begriffen haben, vollkommen entschädigt), daß ein solcher nach Charakter, Sinn und Geburt gleich edler Mann, ein solcher ungarischer Veteran in der höhern Schafzucht, wie Graf Emmerich Festetics, meine Meinung einer so lehrreichen gründlichen, naturgemäßen und auf Erfahrung gestützten Auseinandersetzung gewürdigt hat. Ich für mein Theil finde nichts Wesentliche, worin ich nicht vollkommen zustimmen müßte. Der Hr. Graf selbst erkennt die nothwendige Modification der Fortpflanzung in der Blutsverwandtschaft an, daß sie nicht unbedingt zu geschehen habe. Allenfalls möchte ich doch noch ein kleines Gewicht auf die Einschränkung legen, welche die Forderung besagt: in der Regel die engste Verwandtschaft zu meiden. Es ist dieß freilich ein subtilerer, vielleicht hypothetischer Punkt., unsre Naturphilosophen haben hier, meines Erachtens, einen sehr glücklichen Wurf gemacht und ich würde mich Kürze halber auf sie berufen, wenn es ihnen nur gefällig wäre, auch für uns Andre klar und verständlich zu reden. Ich will den gewagten Versuch machen, mit zwei Worten den Sinn meiner Meinung saßlich anzudeuten.

Mir scheint es Naturgesetz, daß nicht das Homogene, sondern das Heterogene durch gegenseitige Reaction bei den tendere kräftigeren Wirungen, in Gestalten, Formen, neuen Produkten hervorbringt. Worin besteht denn sonst der Geschlechts-Unterschied? Sind die beiden Geschlechter nicht schon ein heterogener Gegeß? Aber giebt es außer diesem Hauptgegeß, nicht, noch eine Menge untergeordneter, die keinesweges. einzeln ohne Einfluß sind, wie viel weniger zusammengenommen? Bei Menschen leuchtet uns dieß mehr ein, weil wir diese schärfer, genauer, nach ihren vielen abweichenden Nuancen beobachten. Es wird kaum bezweifelt werden, daß-z.-B. blauäugigte Blondins in möglichst nächster Verwandtschaft einige Generationen hindurch verheirathet: in den letztern Nachkommen noch schwächere Constitutionen aufweisen werden, als der blonden Varietät überhaupt schon eigen zu seyn pflegt. Und das ist doch nur erste Homogenität, und wie viele giebt es ihrer noch! Es giebt fürstliche und andere Familien, wo dieß eng beobachtete Band zwar ein auffallendes air de famille ausprägte, aber nicht gerade zum Vortheil der Descendenz, woran Schwächung nicht verkannt werden konnte. Vielleicht klärt dies Beispiel meinen Sinn besser auf, als eine lange Deduction. Bei den Pferden hat man ebenfalls genauere Beobachtungen angestellt und auf subtilere Eigenschaften bei der Paarung Rücksicht genommen, welche gebiethen können, nicht in engster Blutsverwandtschaft bespringen zu lassen, gewiß z. B. einen nicht phlegmatischen Bruder mit einer phlegmatischen Schwester, Bei Schafen giebt es nur sehr wenige Besitzer, eher noch Schäfer, welche die individuelle Natur jedes einzelnen Stückes, in einer Heerde von 6–100 Stück so kennen, daß sie es sogleich herauszufinden und zu charakterisiren wissen: Der Thiere sind zu viele und die scheinbare Uebereinstimmung zu groß, und doch wird genauere Beobachtung auch hier mancherlei Homogenes und Heterogenes finden, was Beachtung verdient und es rechtfertigt, wenn ich statt dem Bruder die Schwester zu geben, eine vielerne Verwandte aus überwiegenden Gründen vorziehe. Sollten nicht mehrere Heerdenbesitzer die Wahrnehmung gemacht haben, daß gewisse Widder-wenig-oder gar

keine Zeugungskraft besitzen? Dieß wird nicht nur gleich ein entschiedener Grund, ist solchem Fall die vorher beschlossene engste Verwandtschaft zu verlassen; sondern es liegt auch die Frage ganz nahe: Woher diese Schwächung? Ließe sich die Ursache etwa im Stammbaum finden? Und wieviel Homogenitäten und Heterogenitäten bietet der Wollcharakter dar? Ferner hat das sogenannte Auffrischen des Blutes seinen Sinn und Grund? oder ist es, eine Phantasie? Findet Analogie nach einem Naturgesetz im Pflanzenreich statt! Artet Samen von demselben Stamm - Saueu zuletzt aus und hat das Wechseln des Samens guten Grund oder nicht? Freilich je mehr sich die Natur selbst gelassen bleibt, desto gleicher und treuer bleibt sie sich mit sicherer Kraft in ihren Bildungen auf - lange Descendenzen hinaus. -So wie aber der Naturstand bei der Epilation unter Menschen, bei der Hauszucht unter Thieren verlassen wird, tritt da nicht eo ipso Schwächung der Urkraft und Disposition zur Empfänglichkeit und Empfänglichkeit gegen abweichende Einflüsse ein, welche nachtheilig auf die Vollkraft des Organismus wirken? Doch genug für eine Andeutung, aber viel zu wenig für gründliche Erschöpfung, welche uns die Mittel geben werden.

Aber meinen ganz besondern Dank muß ich dem Herrn Grafen zollen, daß er der Erste ist, der öffentlich und freimüthig anerkennt, was ich über den Zustand unserer Schafzucht und unseres Wollhandels im Hesperus (Jänner 188) vielleicht nicht angenehm und unerwartet, aber doch in reinstem Patriotismus und innigsten Wahrheitsgefühl endlich einmal machte es in manchen Ohren noch so paradox klingen) sagen zu müssen glaubte, und jenen Werth darauf legt, den ich ihm wohl wünschen, aber unmöglich selbst ausdrücken konnte. Indessen glaube ich in jenem Aufsatz einige Wahrheiten aufgestellt zu haben, die so und so zusammengestellt, in dieser Kürze noch nirgends gesagt und von wenigen deutlich gedacht seyn mochten, und die wohl verstanden und beherzigt, in kürzester Zeit und am sichersten diejenigen unserer Schafzüchter (welche nicht bereits Meister und über ihren Weg entschieden sind) zum erwünschten Ziele führen dürften Ist denn der unser Freund, der uns durch Schmeicheleien täuscht, oder Jener, der uns aufrichtig sagt, wie - er uns findet?

André, C.C. 1819. *Economic News and Discussions* 4:26-27

## Debate. Sheep Raising

## Explanation of Count Emmerich von Festetics (Conclusion of Supplement No. 3)

## Remarks of the Publisher.

I think myself perfectly compensated for the greatest honor and sweetest reward (suddenly to me for a multitude of distorted judgements of superficial knowledge, whereof have been understood by me only once), that such a character, mind, and birth [origin] of a man, such a Hungarian veteran in higher sheep raising, like Count von Emmerich Festetics; my opinion of the explanation thus instructive, well-founded and natural, has deemed worthy of supported discussions [statements]. For my part I find nothing essential, in which I must not fully agree. The count himself recognizes the necessary modification of planting [reproduction?] of [those] closely related by blood, that it has not occurred unconditionally. In any event, I would nevertheless still want to give slight importance which the claim mentions: to avoid the closest relationship as the rule. This is freely a more subtle, perhaps more hypothetical point, our natural philosophers have made here, [of] my judgement, a very lucky litter [brood], and I would appeal briefly to [? half of them?], when it would be only pleasant [accommodating] to them, and Andre discussing clearly and intelligibly for us. I want to carry out the risky experiment, to point out the sense [meaning] of my opinion with two words.

It seems to me a law of nature, that not the homogeneous, but rather the heterogeneous by mutual [reciprocal] important reaction of the stronger operation, brings forth new products, in shapes, forms. Otherwise, in what does sexual difference consist, then? Are both sexes not already a heterogeneous opposite? In addition, however, there was contradictory to this principal, not, yet a quantity [multitude] [of] subordinates, the individuals are not at all without influence, as very few are taken together? This is clear [intelligible] to us with people, because we observe them more distinctly, more sufficiently, according to their differing by many nuances. It is scarcely to be doubted, that, for example, that when blue-eyed blonds throughout marry in several generations the most possible closest relationship: still turn out to exhibit weaker constitution in the last [latter] descendants, than the blond variety in general already separately tends to be. And that is only the first homogeneity, and how many of them are there still! There are princely and other families, where this closely observed bond indeed expressed a striking *air de famille*, but not directly to the advantage [benefit] of descendants, whereon [whereat] weakness [debilitation] cannot be mistaken. Perhaps this example explains my meaning better than a long deduction. With horses one has likewise employed enough observations and taken into consideration subtle qualities in mating [pairing], at one's command, not allowing covering mares in close relationships, certainly, for example, not a phlegmatic brother with a phlegmatic sister. In the case of sheep, there were only very few owners, earlier still shepherds, who thus knew the individual nature of each single head in a herd of 6-s00 [misprint] head, that they promptly knew to discover and to characterize: There are too many animals and the apparent dispositions too great, and still yet there is enough observation to find here homogeneity and heterogeneity of several kinds; whatever attention gains and qualifies it, whenever instead of my giving the sister to a brother, I prefer a much more distant relative from prevailing grounds [bases].

Should not some owners of herds have made the observation, that certain rams possess little or no virility [procreative power]? Does this not become similar to a critical basis; is abandoning in such a case the closest relationship decided beforehand; but rather does it also raise the question entirely: from

what place this weakening [debilitation]? Allowed to be found perhaps the in the family tree? And how many homogeneities and heterogeneities does the nature of the wool present? Does the so-called renewing of blood have further its own sense and basis? Or is it a fantasy? Analogy occurs according to natural law in the plant kingdom! Seeds from the same stem [breed, *Stamm*] – degenerate finally, and does the growth of seed have a good basis or not? The more freely nature is allowed remain, the more similar and more true [accurate] it remains open with more certain strength in its formations – descendants outside for a long time. However, so how will the position of Nature work in the case of civilization among humans, abandon in connection with home discipline among animals, weakening [debilitation] and disposition toward susceptibility and sensitivity did not occur [begin] there *eo ipso* [by that fact alone] against deviating influences, detrimental to full health of the organism? Still enough for an indication, but so much for little instead of fundamental exhaustion, which the masters will give us.

However, I must pay respects to Count by my wholly special gratitude, that the first is, often and freely admitted, which about the condition of our sheep raising and our handling of wool, perhaps unexpected and not acceptable in Hesperus (January, 188 [*sic*]), still in the purest patriotism and inner reality- cheerfully finally once it made ring in some ears even thus paradoxically) [single parenthesis], believed to be compelled to say, and that value lies afterwards, that I indeed wish to him, however I was impossibly able to express myself. Nevertheless I believe to have exposed some truth in that article [treatise], who composed this and that, still nowhere said in this short space of time, and wanted to be done clearly from little, and who quite understand, and our sheep raiser considers in the shortest time and most certainly those (who already are not decided about the masters and their way) would be obliged to lead toward the desired aims that our friend, who deceives by flattery, or that one, says to support us, how does he find us?



**André, R. 1819. *Oekonomische Neuigkeiten und Verhandlungen* 21:161–162**

**Meine Anichten und Bemerkungen über organische Schwäche, besonders bei feinwolligen Schafen; veranlaßt durch den Aufsatz des Herrn Grafen Emmerich von Feltetics im Jännerheft 1819. Beilage Nr. 2 u. f. und Nr. 22.**

Der Erklärung des verehrungswürdigen Herrn Grafen hinsichtlich der organischen Schwäche im Jännerhefte 1819, muß ich im Ganzen vollkommen bestimmen; demungeachtet will ich hier versuchen meine Anichten über diesen Gegenstand, so deutlich als möglich, darzustellen. Ich glaube noch weiter als der Herr Graf gehen und die Innzucht als das Hauptmittel, der organischen Schwäche vorzuziehen, anzuwenden zu müssen. Mein Beweis ist folgender. Organische Stärke, oder einen festen, begründeten Organismus besitzt nur jenes Thier, welches mit einem, ihm ganz gleichen Thiere des andern Geschlechtes, wiederum ein den Eltern ganz gleiches Junges hervorbringt. Dieß ist bei den Schafen nur bei homogenen Racethieren der Fall, daher ist auch nach meinen Begriffen ein Raceschaf der Inbegriff organischer Stärke. Homogene Racethiere, untereinander gepaart, erzeugen in der Regel stets wieder starke Organismen. Man kann z. B. eine Raceheerde durch zweckwidrige Behandlung ganz herunter bringen, – aber man lasse sie stets nur unter sich paaren, so stehe ich dafür, sie, auch nach längerer Zeit, bei guter Behandlung und Innzucht nach einigen Generationen wieder ganz in ihren früheren edlen Stand zurückzubringen, sie soll sich durch dieselben Körper, dieselbe Wolle nach Qualität und Quantität wie ehemals charakterisieren. Darin, daß man dieß kann, liegt der Beweis, daß ein Racethier in der Regel stets organische Stärke – oder besser – Festigkeit besitzt.

Ist dieser Vorderatz, wie ich glaube, richtig, so ist mein zucht allein kann ich bei Bastarden und Blendlingen das sie Charakterisirende festhalten und so nach und nach eine (neue) Race bilden; ohne organische Festigkeit und Stärke ist aber keine Race denkbar, folglich ist Innzucht das beste Vorbauungsmittel gegen organische Schwäche, und also auch der einzige Weg, langenzu einem festen Organismus bei seinen Thieren . . . \* zu", geF. Organische Schwäche findet in der Regel nur bei Bastarden oder Blendlingen statt, die ein Produkt zweier verschiedenartiger Organismen, die sich vermischten, sind (der Vater war anders und die Mutter anders), deren Organismus also erst neu gebildet, noch nicht begründet und befestigt ist, was erst dann geschieht, wenn diese sich gleichen Bastarde immer und immer, nur durch viele Generationen unter sich fort gepflanzt, zur Fortpflanzung aber nur solche Individuen unter ihnen gebraucht werden, welche den ursprünglich gebildeten Bastarden an Körper und Wolle vollkommen gleichen, und erst dann, wenn diese lauter Junge erzeugen, die in ihren eben genannten äußeren Eigenschaften vollkommen den ursprünglichen Bastarten gleichen – erst dann kann man auf einen begründeten Organismus schließen, der in der Regel immer und ewig die bezweckten äußeren Eigenschaften hervorbringt, – und so werden Bastarde nach und nach zu Racethieren erhoben. Dieß ist – oder soll wenigstens der Prozeß unserer Veredlungen seyn, wenn sie solid genannt werden sollen. Dieser hier definirten organischen Stärke der Racethiere und organischen Schwäche der Bastarde und Blendlinge möchte ich, zur treffenderen Unterscheidung und genaueren Beschreibung der Individuen das Beiwort „permanent“ zulegen; denn ein Blendling oder Bastard unterliegt an sich, so lange er lebt, der organischen Schwäche – einem Racethier bleibt dagegen stets seine organische Festigkeit, die Fälle ausgenommen, wo, als Ausnahme von der Regel, durch Krankheit, widernatürliche Behandlung und dgl. auf einige Zeit (insolange nämlich dieser abnorme Zustand dauert) durch innerliche Zerrüttung organische Schwäche eintritt, die ich durch das Beiwort „temporell“ bezeichnen möchte, weil dadurch gleichsam das Vorübergehende, bloß Zufällige dieser Schwächung des Organismus angezeigt wird. - Nach diesen Anichten kann ich nun die Feinheit des

Wollfadens so wenig für ein Produkt der organischen Schwäche anfehen, als den feinen Bau eines arabischen Pferdes. Raiz im März 1819. - Rudolf André, Verwalter,

My Views and Remarks concerning Organic Weakness, especially in Sheep with Fine Wool.

In response to Count Emmerich von Festic's Essay in the January Issue 1819, Insert No. 2 and No. 22.

Generally, I will agree with the respect-worthy Count's declarations in the January Issue, concerning the organic debility, however I shall herewith attempt to present my views in a generally understandable manner. I am, however, going even further than the Count, in that I consider inbreeding as the main way to defeat the organic weakness. My proof is the following. Organic strength or a fully developed organism can only be found in an animal that was paired with an animal of the opposite gender, but with the same characteristics, and which then produces offspring showing the same traits. This can only happen with purebred sheep and therefore it is my opinion that purebred animals are the essence of organic strength. Homogenous animals that breed among themselves, generally produce strong organisms in return. One could for instance ruin a purebred flock by misinformed treatment. However, if then left to pairing among themselves, I expect them to recover their former state of wellbeing with the help of good treatment and inbreeding during several generations. They will once again produce wool of the same quality and quantity as before. And the pure fact that one can achieve this, is proof that a purebred animal generally always has organic strength - or better said, organic resilience. Is this assumption correct, then I could make the characteristics of bastards or mixed-breed animals permanent by inbreeding them and therewith create new breeds. But no breed is viable without organic strength and firmness, and therefore inbreeding is the best way to prevent organic weakness and, in the long run, to assure a solid organism among the flock.

\*/Generally, organic weakness can only be found among bastards or mixed-breeds, which are the result of two distinct organisms that were blended - that is to say, the father was one, the mother another - so that the result was a new, not fully developed organism. The final development only occurs when these mixed-breed animals inbreed for several generations and when, for this purpose, only animals were chosen that presented the strongest characteristics of the mixed-breed ancestors. Then the characteristics become firmly established. The resulting young will then eventually present a firmly established organism, which will then be reproduced ad infinitum. And in this way, bastards will then be elevated to purebred status. This is the way to solid breed improvement.

To the definition of organic strength of the purebred and the organic weakness of the mixed breed, I would like to add the word "permanent" to make it clear that a mixed breed animal will have the organic weakness for as long as it lives, just as the purebred will have a lifelong organic strength, as long as it is in good health and gets good treatment. Sickness and bad treatment will cause organic weakness, which however is temporal. And with these observations, I can not think of the quality of the wool as a product of organic weakness, I see it as I see the fine conformation of an Arabic stallion.

Raitz, March 1819 - Rudolf Andre - Administrator.
